# Supplementary material
Source: PubMed Central journal article supplement (PMC4625682)
Supplement: ASN.2014121233_ASN2014121233SupplementaryData.pdf [file ASN.2014121233_ASN2014121233SupplementaryData.pdf]

## **Supplemental Materials**

This appendix was provided by the authors to give readers additional information about this manuscript.

### **Ambient Melamine Exposure and Urinary Biomarkers of Early Renal Injury**

Chia-Fang Wu, Chiung-Yu Peng, Chia-Chu Liu, Wen-Yi Lin, Chih-Hong Pan, Ching-Mei Cheng, Hui-Ming Hsieh, Tusty-Juan Hsieh, Bai-Hsiun Chen, Ming-Tsang Wu

## **METHODS**

### ***Questionnaire***

All eligible exposed and non-exposed workers were interviewed by well-trained researchers using a structured questionnaire face-to-face to collect detailed information about demographic characteristics, medical history, family history, their uses of substances (cigarette, alcohol, and betel quid), and occupational history. Body weight (kg) and body height (cm) were measured by professional examiners while participants stood in light street clothes. Body mass index (BMI (kg/m<sup>2</sup>)) was calculated with body weight divided by the square of body height. Family history of renal calculi or other kidney-related disease were considered to be present if any first-degree relative had a history of urolithiasis or other kidney-related disease.

Subjects were defined as alcohol drinkers, cigarette smokers or betel quid chewers if they had regularly consumed any alcoholic beverage  $\geq 1$  times per week, smoked  $\geq 10$  cigarettes per week, or chewed  $\geq 1$  betel quid per day for at least 6 months.<sup>1</sup> These three variables of substance uses from questionnaire have been validated by using different biomarkers in our previous study.<sup>2</sup> Occupational history, including job title, job duration, past working history, and use of personal protective equipment (e.g., dust masks), were also collected.

### ***Quantification and method validation of melamine in air, urine, and serum samples***

For the measurement of melamine in air sample, we modified the analytical method from Yassine *et al.*<sup>3</sup> After weighing, all filters were placed in glass extraction vials and spiked with melamine isotopically labeled standards before extraction. Glass fibers were wetted by using 20  $\mu$ l isopropanol and then were sonicated for 30 min with the mixture of 1 ml 2% (v/v) formic acid/acetonitrile (ACN). Subsequently, the extract was filtered through a 0.22  $\mu$ m polyvinylidene fluoride (PVDF) syringeless filter device with polypropylene housing (Mini-Uniprep<sup>TM</sup> Syringeless Filter; Whatman, Florham Park, NJ, USA). The analysis of melamine in blank samples followed the same procedure. Finally, the filtered samples were transferred into certified liquid chromatography (LC) vials for analysis by the method of liquid chromatography-electrospray ionization-tandem mass spectrometry (LC-ESI-MS/MS) (Supplemental Figure 1).<sup>4</sup>

To extract melamine from serum samples, <sup>13</sup>C<sub>3</sub><sup>15</sup>N<sub>3</sub>-melamine was added as an internal standard to an aliquot of 300  $\mu$ l serum samples. Then, 900  $\mu$ l 2% phosphoric acid was added to the mixture and vortexed, and the mixture was centrifuged at 3,500 rpm for 10 minutes under room temperature. The aqueous supernatant was introduced into the solid-phase-extraction (SPE) cartridge (Bond Elut Plexa PCX 60  $\mu$ m, 1ml, 30

mg) for analysis (Supplemental Figure 2).<sup>4</sup> For the measurement of melamine and creatinine in urine samples, the detailed methods are described elsewhere.<sup>4,5</sup> Briefly, the elute of 1 ml urine sample collected from an Oasis® MCX SPE cartridge (Waters Corp., Malford, MA, USA) was dried under nitrogen gas. Then, the residues were reconstituted in 200 µl mobile phase and subjected into LC-MS/MS for analysis. The method of detection limit (MDL) in urine was 0.8 ng/ml (ppb), with any measurement below MDL treated as 0.4 ng/ml.<sup>4,5</sup> Urinary creatinine was determined using spectrophotometry (U-2000; Hitachi, Tokyo, Japan) at a wavelength of 520 nm to measure the creatinine–picrate reaction. Urinary melamine concentration were expressed either ng/ml or µg/mmol creatinine. In the present study, urinary melamine levels were detectable in all 39 (100%) urinary samples in 39 melamine workers and 39 (92.9%) out of 42 urinary samples in the non-exposed workers.

The method validations for air and serum samples are summarized in Table S2. The MDL was determined using a blank glass fiber sample or blank serum sample spiked with standards. For air samples, the MDL was 50 ng/ml; thus, MDL of air melamine concentration was converted to unit at ng/m<sup>3</sup> as 46.30 ng/m<sup>3</sup>. For serum samples, the MDL was 1.33 ng/ml in serum.

#### ***Quantification and method validation of formaldehyde in air samples***

The analytical method of formaldehyde was adopted from previous studies.<sup>6,7</sup> Air samples were extracted with ACN and analyzed by the method of high-performance liquid chromatography with UV detection (HPLC-UV) (Jasco PU-2809, Japan/Varian UV-Vis detector, USA) in a gradient mode from 40% acetonitrile/60% water to 90% acetonitrile /10% water at a wavelength of 360 nm. The MDL was 0.23 µg/m<sup>3</sup> (Supplemental Table 2).

#### ***Analyses of renal injury biomarkers in urine***

The quantitation of urinary microalbumin, NAG, and β2-microglobulin have been described in detail elsewhere.<sup>5</sup> The assay kits included microalbumin kit/ALB-TIA “SEIKEN” X1 (Denka Seiken, Tokyo, Japan), NAG assay kit (Diazyme Laboratory, Poway, CA), and N Latex β2-microglobulin assay (Siemens Healthcare Diagnostics, Marburg, Germany). The MDLs were 0.96 ng/ml for microalbumin and 0.206 mg/l for β2-microglobulin.<sup>5</sup>

#### ***Analysis of serum biochemistry and other examinations***

All routine biochemistries such as liver function, cardiometabolic function, and renal function (BUN, creatinine, and uric acid) were measured in the central clinical laboratory of KMHKH. Both exposed and non-exposed workers underwent renal echo,

whereas only exposed workers (melamine workers) had KUB radiography (Kidney, ureter, bladder X-ray) to detect any urolithiasis. All task forces were performed by health staff members who were blinded to this study design from KMHKH.

## References

1. Liu CC, Huang SP, Wu WJ, Chou YH, Juo SH, Tsai LY, Huang CH, Wu MT: The impact of cigarette smoking, alcohol drinking and betel quid chewing on the risk of calcium urolithiasis. *Ann Epidemiol* 19: 539-545, 2009.
2. Lin MY, Chen MC, Wu IC, Wu DC, Cheng YJ, Wu CC, Chai CY, Lee JM, Wu MT: Areca users in combination with tobacco and alcohol use are associated with younger age of diagnosed esophageal cancer in Taiwanese men. *PLoS ONE* 6: e25347, 2011.
3. Yassine MM, Dabek-Zlotorzynska E, Celo V: Development of a hydrophilic interaction liquid chromatography-mass spectrometry method for detection and quantification of urea thermal decomposition by-products in emission from diesel engine employing selective catalytic reduction technology. *J Chromatogr A* 1229: 208-215, 2012.
4. Wu CF, Liu CC, Chen BH, Huang SP, Lee HH, Chou YH, Wu WJ, Wu MT: Urinary melamine and adult urolithiasis in Taiwan. *Clin Chim Acta* 411: 184-189, 2010.
5. Lin YT, Tsai MT, Chen YL, Cheng CM, Hung CC, Wu CF, Liu CC, Hsieh TJ, Shiea J, Chen BH, Wu MT: Can melamine levels in one-spot overnight urine specimens predict the total previous 24-hour melamine excretion level in school children? *Clin Chim Acta* 420: 128-133, 2013.
6. Katsuta I, Shimizu M, Yamaguchi T, Nakajima Y: Emission of volatile aldehydes from DAG-Rich and TAG-Rich oils with different degrees of unsaturation during Deep-Frying. *J Am Oil Chem Soc* 85: 513-519, 2008.
7. US EPA. Compendium of Methods for the Determination of Toxic Organic Compounds in Ambient Air, 2nd ed., TO-11A, EPA/625/R-96/010b. Environmental Protection Agency, Washington DC; 1999.
8. Srivastava AK, Gupta BN, Gaur JS, Bihari V: Clinical evaluation of workers handling melamine formaldehyde resin. *J Toxicol Clin Toxicol* 30: 677-681, 1992.
9. Aalto-Korte K, Jolanki R, Estlander T: Formaldehyde-negative allergic contact dermatitis from melamine-formaldehyde resin. *Contact Dermatitis* 49: 194-196, 2003.
10. Garcia Gavin J, Loureiro Martinez M, Fernandez-Redondo V, Seoane MJ, Toribio J: Contact allergic dermatitis from melamine formaldehyde resins in a patient with a negative patch-test reaction to formaldehyde. *Dermatitis* 19: E5-6, 2008.
11. Niemelä R, Vainio H: Formaldehyde exposure in work and the general environment. Occurrence and possibilities for prevention. *Scand J Work environ Health* 7: 95-100, 1981.

12. Marsh GM, Stone RA, Henderson VL: Lung cancer mortality among industrial workers exposed to formaldehyde: a Poisson regression analysis of the National Cancer Institute Study. *Am Ind Hyg Assoc J* 53: 681-691, 1992.
13. Isaksson M, Zimerson E, Bruze M: Occupational dermatoses in composite production. *J Occup Environ Med* 41: 261-266, 1999.
14. Lazarov A: Textile dermatitis in patients with contact sensitization in Israel: a 4-year prospective study. *J Eur Acad Dermatol Venereol* 18: 531-537, 2004.
15. Neghab M, Soltanzadeh A, Choobineh A: Respiratory morbidity induced by occupational inhalation exposure to formaldehyde. *Ind Health* 49: 89-94, 2011.
16. Lam CW, Lan L, Che X, Tam S, Wong SS, Chen Y, Jin J, Tao SH, Tang XM, Yuen KY, Tam PK: Diagnosis and spectrum of melamine-related renal disease: plausible mechanism of stone formation in humans. *Clin Chim Acta* 402: 150-155, 2009.
17. Cheng WC, Chen SK, Lin TJ, Wang IJ, Kao YM, Shih DY: Determination of urine melamine by validated isotopic ultra-performance liquid chromatography/tandem mass spectrometry. *Rapid Commun Mass Spectrom* 23: 1776-1782, 2009.
18. Zhang M, Li S, Yu C, Liu G, Jia J, Lu C, He J, Ma Y, Zhu J, Yu C: Determination of melamine and cyanuric acid in human urine by a liquid chromatography tandem mass spectrometry. *J Chromatogr B Analyt Technol Biomed Life Sci* 878: 758-762, 2010.
19. Gao J, Xu H, Kuang XY, Huang WY, Zhao NQ, Rao J, Qian QY, Cheng XY, Feng ZM, Xu J, Zhang X, Wang X: Follow-up results of children with melamine induced urolithiasis: a prospective observational cohort study. *World J Pediatr* 7: 232-239, 2011.
20. Liu CC, Wu CF, Chen BH, Huang SP, Goggins W, Lee HH, Chou YH, Wu WJ, Huang CH, Shiea J, Lee CH, Wu KY, Wu MT: Low exposure to melamine increases the risk of urolithiasis in adults. *Kidney Int* 80: 746-752, 2011.
21. Kong AP, Choi KC, Ho CS, Chan MH, Wong CK, Liu EK, Chu WC, Chow VC, Lau JT, Chan JC: Hong Kong Chinese school children with elevated urine melamine levels: a prospective follow up study. *BMC Public Health* 11: 354, 2011.
22. Panuwet P, Nguyen JV, Wade EL, D'Souza PE, Ryan PB, Barr DB: Quantification of melamine in human urine using cation-exchange based high performance liquid chromatography tandem mass spectrometry. *J Chromatogr B Analyt Technol Biomed Life Sci* 887-888: 48-54, 2012.
23. Wu CF, Hsieh TJ, Chen BH, Liu CC, Wu MT: A crossover study of noodle soup consumption in melamine-made bowls and total melamine excretion in urine. *JAMA Intern Med* 173: 317-319, 2013.

## Legends

### **Supplemental Figure 1. Flowchart of study subjects.**

### **Supplemental Figure 2. Signals of ion chromatograms for ambient melamine.**

a) Blank glass fibers; b) Glass fibers fortified with 1.0 ng of melamine standard; c) Melamine in air samples with the concentration of 6.09 ng/m<sup>3</sup>. (Upper and middle panels of chromatograms are melamine standard and lower panel of chromatogram is <sup>13</sup>C<sub>3</sub><sup>15</sup>N<sub>3</sub>-melamine internal standard (IS)).

### **Supplemental Figure 3. Signals of ion chromatograms for serum melamine.**

a) Negative control serum without fortified melamine standard; b) Control serum with fortified 2.0 ng/ml of melamine standard; c) Melamine in one serum sample of melamine worker. The melamine level from this sample was calculated to be 10.54 ng/ml. (Upper and middle panels of chromatograms are melamine standard and lower panel of chromatogram is <sup>13</sup>C<sub>3</sub><sup>15</sup>N<sub>3</sub>-melamine internal standard (IS)).

**Supplemental Figure 4. The ambient distribution of different dust particle sizes (particulate matter (PM) 10, 2.5, and 1.0 μm) in a real-time status (one measurement every one minute) by portable laser aerosol spectrometers and dust monitors in one melamine manufacturing company (Factory A) during work from Monday to Friday.** a) Monday; b) Tuesday; c) Wednesday; d) Thursday; e) Friday. (arrow indicates one worker smoked cigarettes close to the area dust monitor).

### **Supplemental Figure 5. Predicted temporal change of urinary melamine**

**concentrations by work sites.** a) Predicted daily mean (± SE) difference of post-shift and pre-shift of urinary melamine concentration by work sites from Monday to Friday; b) Predicted daily mean (± SE) urinary melamine concentrations in the morning by work sites from Monday, weekend, to the following Monday.

### **Supplemental Figure 6. Relationship between urinary melamine concentrations and early renal tubular injury markers in urine by work sites.**

a) Urinary melamine concentrations and NAG levels (n = 81); b) Urinary melamine concentrations and microalbumin levels (n = 81). Abbreviation: Cr = creatinine; NAG = N-acetyl β-D-glucosaminidase.

### **Supplemental Table 1. STROBE Statement—checklist of items that should be included in reports of observational studies**

**Supplemental Table 2. Accuracy and precision of melamine validation solutions spiked in air and serum samples (n = 5 each), and formaldehyde validation solutions spiked in air samples (n = 5).**

**Supplemental Table 3. Daily averaged preshift and postshift urinary melamine concentration in melamine workers by work sites.**

**Supplemental Table 4. Daily averaged ambient personal and area melamine and formaldehyde concentrations ( $\mu\text{g}/\text{m}^3$ ) in melamine workers by work sites.**

**Supplemental Table 5. Daily averaged ambient concentrations of different dust particle sizes (particulate matter (PM) 10, 2.5, and 1.0  $\mu\text{m}$ ) by portable laser aerosol spectrometers and dust monitors in one melamine manufacturing company (Factory A) during work.**

**Supplemental Table 6. Daily variations of preshift and postshift urinary melamine concentrations concentrations in generalized linear mixed models.<sup>a</sup>**

**Supplemental Table 7. Other clinical and laboratory data in melamine tableware manufacturing workers by work sites and their comparison group.**

**Supplemental Table 8. Relationship of urinary biomarkers of renal injury with urinary melamine levels or work sites after adjusting for hypertension in multiple linear regression models.**

**Supplemental Table 9. Summary of literature data about industry of melamine-formaldehyde resin related to occupational melamine exposure.**

**Supplemental Table 10. Summary of urinary melamine concentration variations in different populations from the literature.**



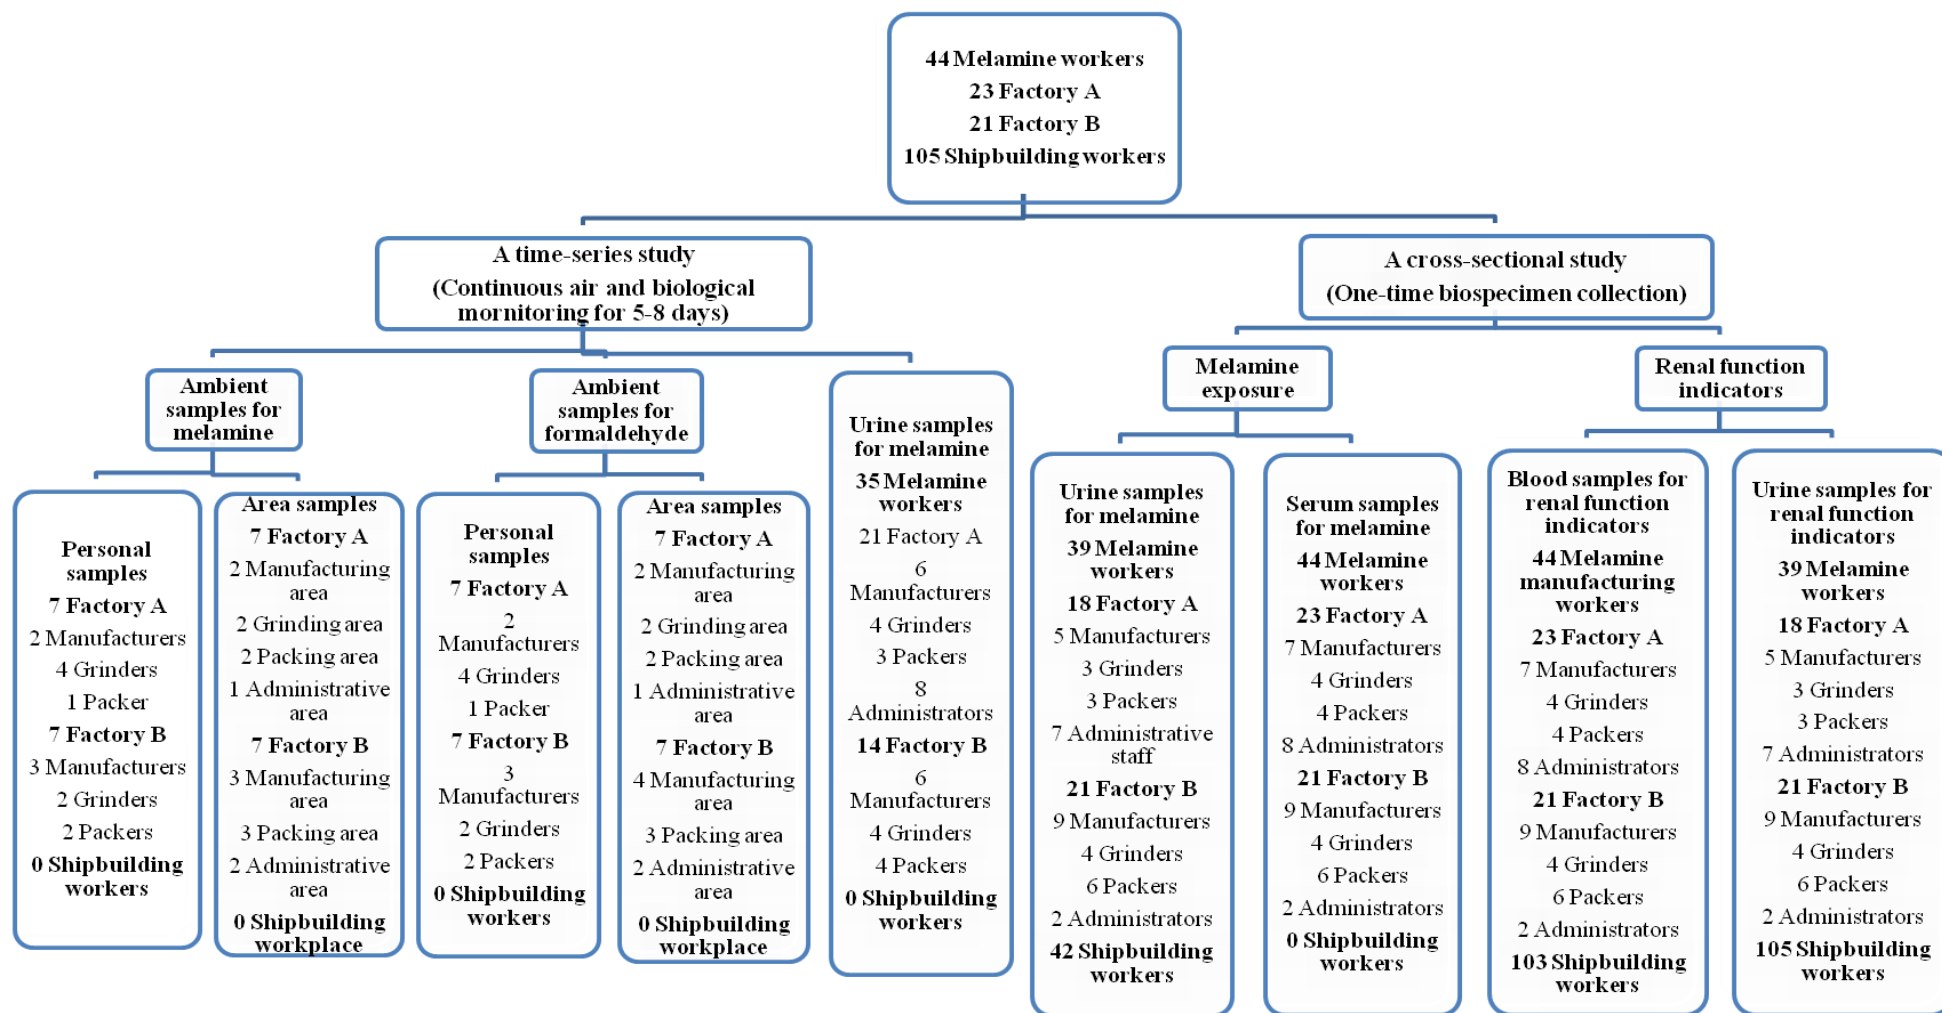

Supplemental Figure 1. Flowchart of study

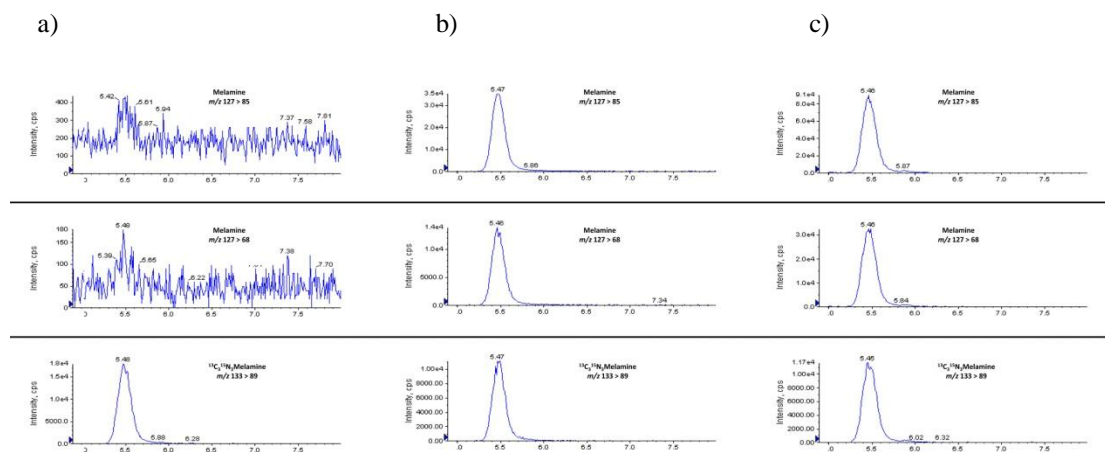

**Supplemental Figure 2. Signals of ion chromatograms for ambient melamine.** a) Blank glass fibers; b) Glass fibers fortified with 1.0 ng of melamine standard; c) Melamine in air samples with the concentration of 6.09 ng/m<sup>3</sup>. (Upper and middle panels of chromatograms are melamine standard and lower panel of chromatogram is <sup>13</sup>C<sub>3</sub><sup>15</sup>N<sub>3</sub>-melamine internal standard (IS)).

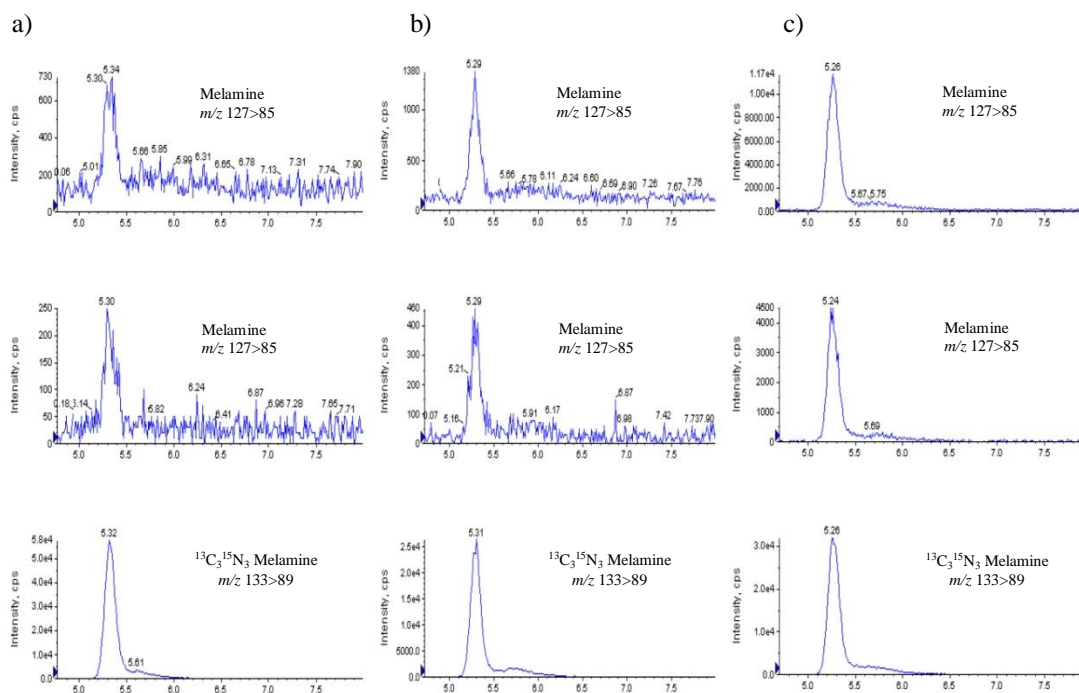

**Supplemental Figure 3. Signals of ion chromatograms for serum melamine.** a) Negative control serum without fortified melamine standard; b) Control serum with fortified 2.0 ng/ml of melamine standard; c) Melamine in one serum sample of melamine worker. The melamine level from this sample was calculated to be 10.54 ng/ml. (Upper and middle panels of chromatograms are melamine standard and lower panel of chromatogram is  $^{13}\text{C}_3\text{ }^{15}\text{N}_3$ -melamine internal standard (IS)).

### Manufacturing area

### Administrative area

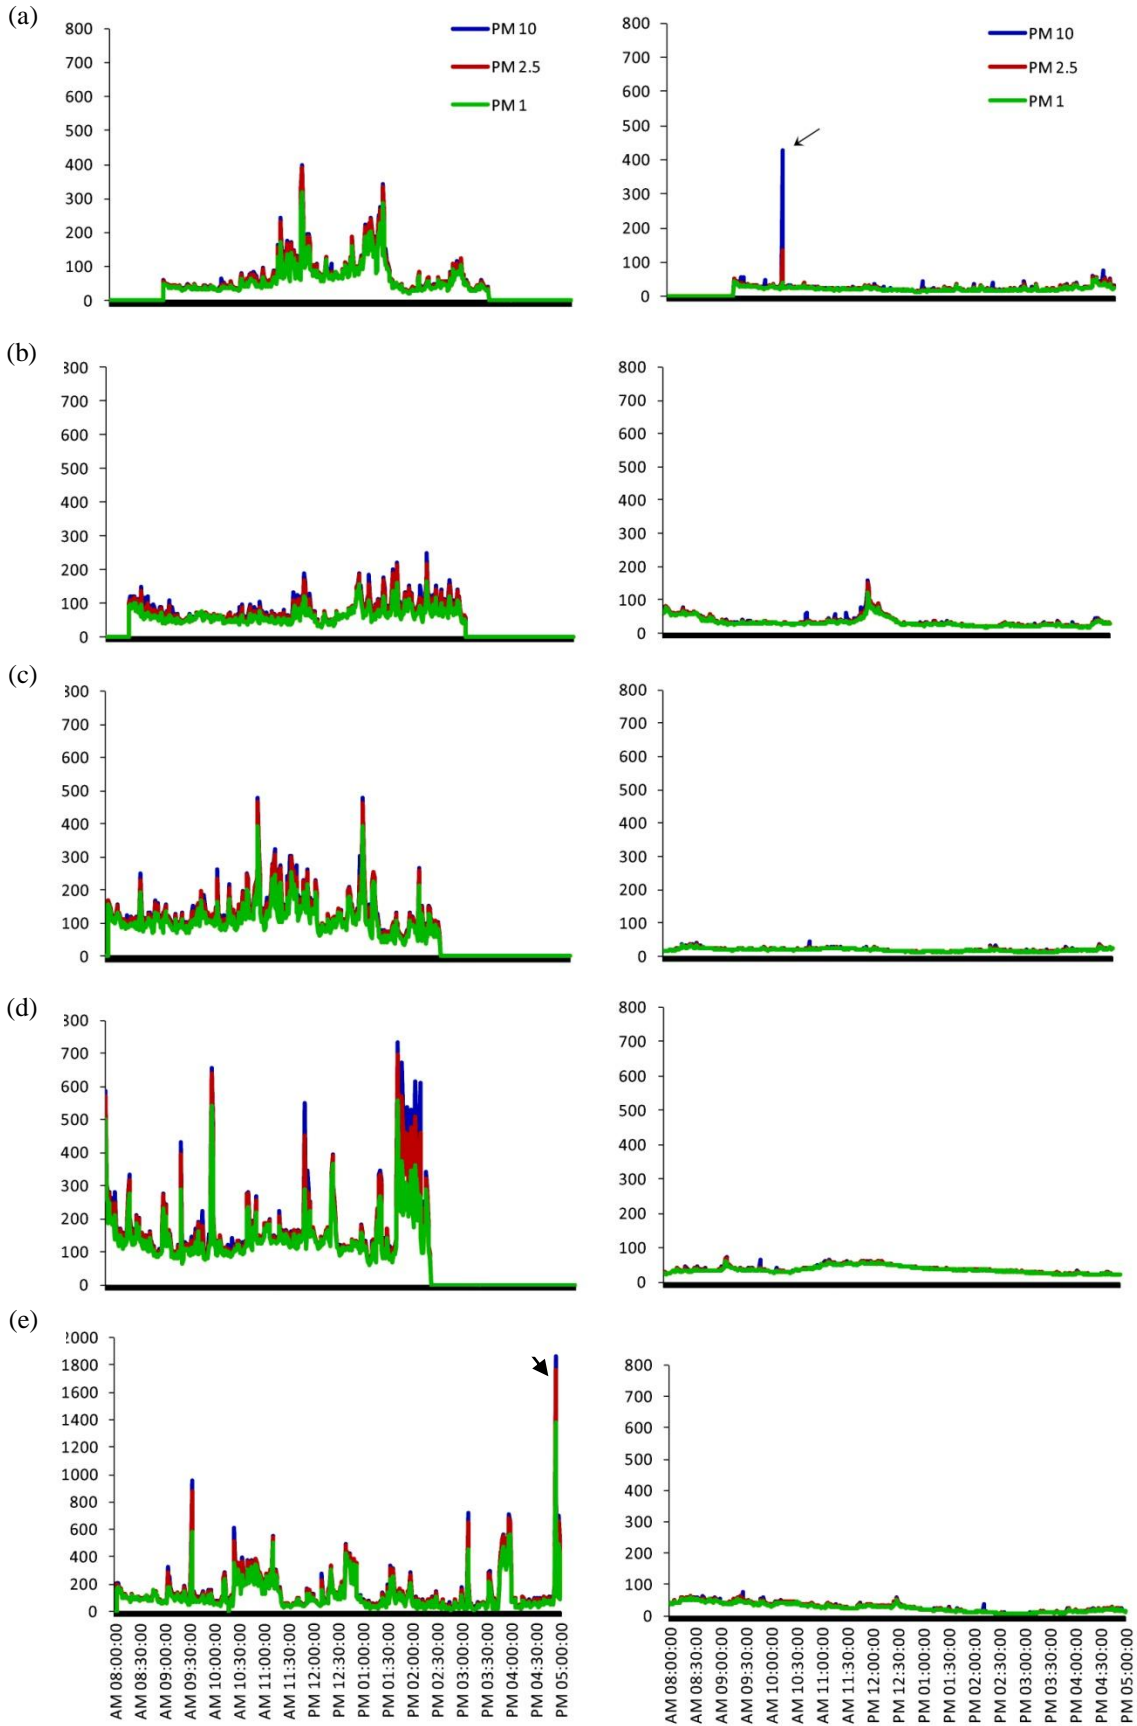

**Supplemental Figure 4. The ambient distribution of different dust particle sizes (particulate matter (PM) 10, 2.5, and 1.0  $\mu\text{m}$ ) in a real-time status (one measurement every one minute) by portable laser aerosol spectrometers and dust monitors in one melamine manufacturing company (Factory A) during work from Monday to Friday. a) Monday; b) Tuesday; c) Wednesday; d) Thursday; e) Friday. (arrow indicates one worker smoked cigarettes close to the area dust monitor; arrow head indicates the highest ambient concentrations of PM 10  $\mu\text{m}$  ( $1861.8 \mu\text{g}/\text{m}^3$ ), PM 2.5  $\mu\text{m}$  ( $1761.1 \mu\text{g}/\text{m}^3$ ) and PM 1.0  $\mu\text{m}$  ( $1384.1 \mu\text{g}/\text{m}^3$ ))**

a)

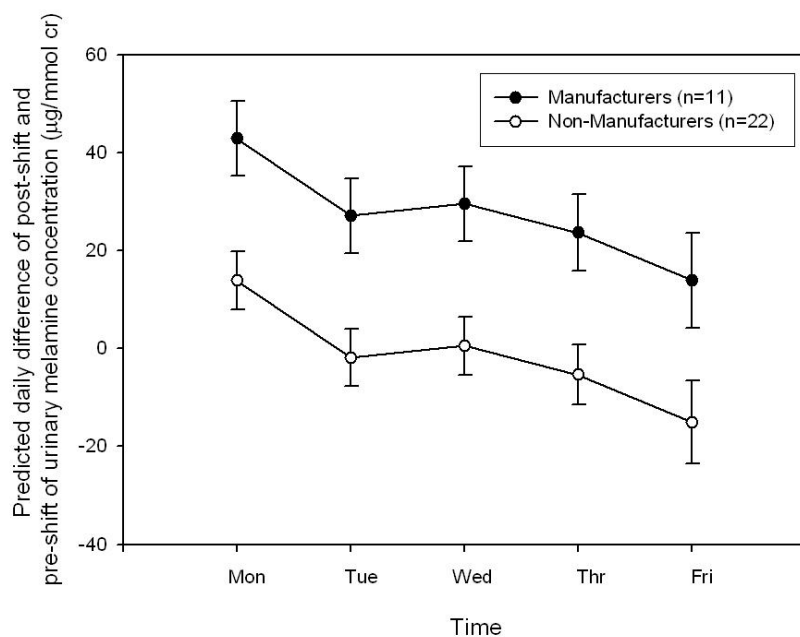

b)

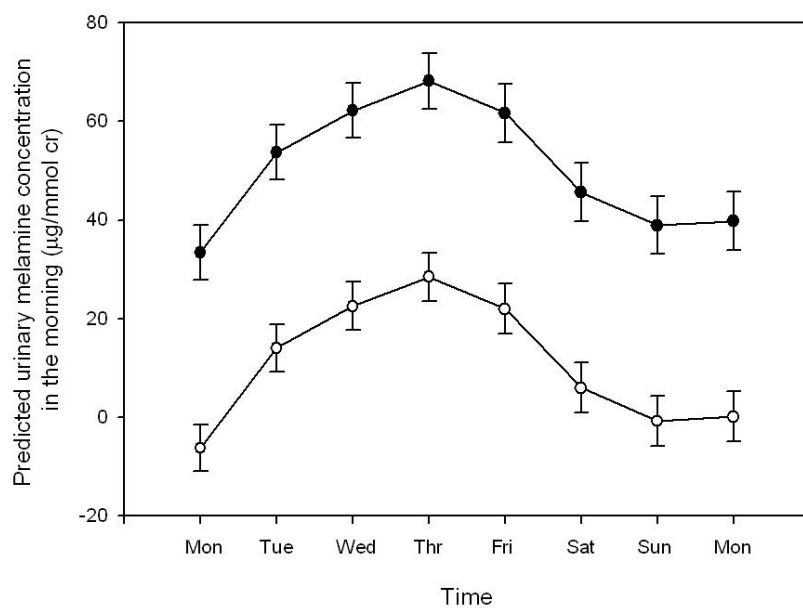

**Supplemental Figure 5. Predicted temporal change of urinary melamine concentrations by work sites.** a) Predicted daily mean ( $\pm$  SE) difference of post-shift and pre-shift of urinary melamine concentration by work sites from Monday to Friday; b) Predicted daily mean ( $\pm$  SE) urinary melamine concentrations in the morning by work sites from Monday, weekend, to the following Monday.

a)

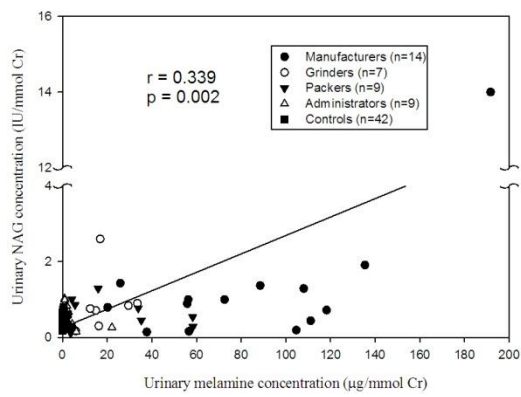

b)

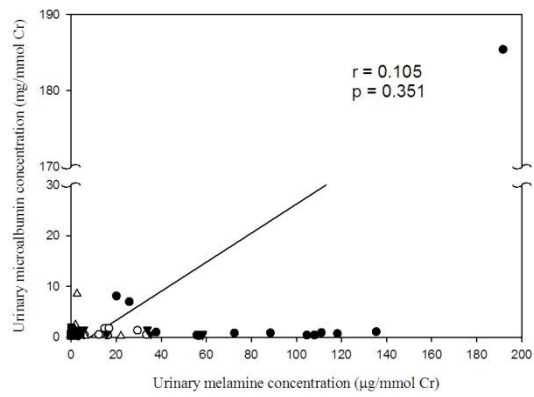

**Supplemental Figure 6. Spearman correlation between urinary melamine concentrations and early renal tubular injury markers in urine by work sites. a) Urinary melamine concentrations and NAG levels (n = 81); b) Urinary melamine concentrations and microalbumin levels (n = 81). Abbreviation: Cr = creatinine; NAG = N-acetyl  $\beta$ -D-glucosaminidase.**

**Supplemental Table 1. STROBE Statement—checklist of items that should be included in reports of observational studies**

|                          | Item No | Recommendation                                                                                                                                                                                                                                                                                                                                                                                                                                                         | Checklist |
|--------------------------|---------|------------------------------------------------------------------------------------------------------------------------------------------------------------------------------------------------------------------------------------------------------------------------------------------------------------------------------------------------------------------------------------------------------------------------------------------------------------------------|-----------|
| Title and abstract       | 1       | (a) Indicate the study's design with a commonly used term in the title or the abstract                                                                                                                                                                                                                                                                                                                                                                                 | Yes       |
|                          |         | (b) Provide in the abstract an informative and balanced summary of what was done and what was found                                                                                                                                                                                                                                                                                                                                                                    | Yes       |
| <b>Introduction</b>      |         |                                                                                                                                                                                                                                                                                                                                                                                                                                                                        |           |
| Background/rationale     | 2       | Explain the scientific background and rationale for the investigation being reported                                                                                                                                                                                                                                                                                                                                                                                   | Yes       |
| Objectives               | 3       | State specific objectives, including any prespecified hypotheses                                                                                                                                                                                                                                                                                                                                                                                                       | Yes       |
| <b>Methods</b>           |         |                                                                                                                                                                                                                                                                                                                                                                                                                                                                        |           |
| Study design             | 4       | Present key elements of study design early in the paper                                                                                                                                                                                                                                                                                                                                                                                                                | Yes       |
| Setting                  | 5       | Describe the setting, locations, and relevant dates, including periods of recruitment, exposure, follow-up, and data collection                                                                                                                                                                                                                                                                                                                                        | Yes       |
| Participants             | 6       | (a) <i>Cohort study</i> —Give the eligibility criteria, and the sources and methods of selection of participants. Describe methods of follow-up<br><i>Case-control study</i> —Give the eligibility criteria, and the sources and methods of case ascertainment and control selection. Give the rationale for the choice of cases and controls<br><i>Cross-sectional study</i> —Give the eligibility criteria, and the sources and methods of selection of participants | Yes       |
|                          |         | (b) <i>Cohort study</i> —For matched studies, give matching criteria and number of exposed and unexposed<br><i>Case-control study</i> —For matched studies, give matching criteria and the number of controls per case                                                                                                                                                                                                                                                 | N/A       |
| Variables                | 7       | Clearly define all outcomes, exposures, predictors, potential confounders, and effect modifiers. Give diagnostic criteria, if applicable                                                                                                                                                                                                                                                                                                                               | Yes       |
| Data sources/measurement | 8*      | For each variable of interest, give sources of data and details of methods of assessment (measurement). Describe comparability of assessment methods if there is more than one group                                                                                                                                                                                                                                                                                   | Yes       |
| Bias                     | 9       | Describe any efforts to address potential sources of bias                                                                                                                                                                                                                                                                                                                                                                                                              | Yes       |
| Study size               | 10      | Explain how the study size was arrived at                                                                                                                                                                                                                                                                                                                                                                                                                              | Yes       |
| Quantitative variables   | 11      | Explain how quantitative variables were handled in the analyses. If applicable, describe which groupings were chosen and why                                                                                                                                                                                                                                                                                                                                           | Yes       |
| Statistical methods      | 12      | (a) Describe all statistical methods, including those used to control for confounding                                                                                                                                                                                                                                                                                                                                                                                  | Yes       |
|                          |         | (b) Describe any methods used to examine subgroups and interactions                                                                                                                                                                                                                                                                                                                                                                                                    | Yes       |
|                          |         | (c) Explain how missing data were addressed                                                                                                                                                                                                                                                                                                                                                                                                                            | Yes       |
|                          |         | (d) <i>Cohort study</i> —If applicable, explain how loss to follow-up was addressed<br><i>Case-control study</i> —If applicable, explain how matching of cases and controls was addressed<br><i>Cross-sectional study</i> —If applicable, describe analytical methods taking account of sampling strategy                                                                                                                                                              | Yes       |
|                          |         | (e) Describe any sensitivity analyses                                                                                                                                                                                                                                                                                                                                                                                                                                  | N/A       |
| <b>Results</b>           |         |                                                                                                                                                                                                                                                                                                                                                                                                                                                                        |           |



|                          |     |                                                                                                                                                                                                              |     |
|--------------------------|-----|--------------------------------------------------------------------------------------------------------------------------------------------------------------------------------------------------------------|-----|
| Participants             | 13* | (a) Report numbers of individuals at each stage of study—eg numbers potentially eligible, examined for eligibility, confirmed eligible, included in the study, completing follow-up, and analysed            | Yes |
|                          |     | (b) Give reasons for non-participation at each stage                                                                                                                                                         | Yes |
|                          |     | (c) Consider use of a flow diagram                                                                                                                                                                           | Yes |
| Descriptive data         | 14* | (a) Give characteristics of study participants (eg demographic, clinical, social) and information on exposures and potential confounders                                                                     | Yes |
|                          |     | (b) Indicate number of participants with missing data for each variable of interest                                                                                                                          | Yes |
|                          |     | (c) <i>Cohort study</i> —Summarise follow-up time (eg, average and total amount)                                                                                                                             | N/A |
| Outcome data             | 15* | <i>Cohort study</i> —Report numbers of outcome events or summary measures over time                                                                                                                          | N/A |
|                          |     | <i>Case-control study</i> —Report numbers in each exposure category, or summary measures of exposure                                                                                                         | N/A |
|                          |     | <i>Cross-sectional study</i> —Report numbers of outcome events or summary measures                                                                                                                           | Yes |
| Main results             | 16  | (a) Give unadjusted estimates and, if applicable, confounder-adjusted estimates and their precision (eg, 95% confidence interval). Make clear which confounders were adjusted for and why they were included | Yes |
|                          |     | (b) Report category boundaries when continuous variables were categorized                                                                                                                                    | Yes |
|                          |     | (c) If relevant, consider translating estimates of relative risk into absolute risk for a meaningful time period                                                                                             | Yes |
| Other analyses           | 17  | Report other analyses done—eg analyses of subgroups and interactions, and sensitivity analyses                                                                                                               | Yes |
| <b>Discussion</b>        |     |                                                                                                                                                                                                              |     |
| Key results              | 18  | Summarise key results with reference to study objectives                                                                                                                                                     | Yes |
| Limitations              | 19  | Discuss limitations of the study, taking into account sources of potential bias or imprecision. Discuss both direction and magnitude of any potential bias                                                   | Yes |
| Interpretation           | 20  | Give a cautious overall interpretation of results considering objectives, limitations, multiplicity of analyses, results from similar studies, and other relevant evidence                                   | Yes |
| Generalisability         | 21  | Discuss the generalisability (external validity) of the study results                                                                                                                                        | Yes |
| <b>Other information</b> |     |                                                                                                                                                                                                              |     |
| Funding                  | 22  | Give the source of funding and the role of the funders for the present study and, if applicable, for the original study on which the present article is based                                                | Yes |

**Supplemental Table 2. Accuracy and precision of melamine validation solutions spiked in air and serum samples (n = 5 each), and formaldehyde validation solutions spiked in air samples (n = 5).**

| Spiked concentration (ng/ml) | Day 1                     |                      | Day 2        |         | Interday difference (%) <sup>c</sup> | LOQ  | MDL   |
|------------------------------|---------------------------|----------------------|--------------|---------|--------------------------------------|------|-------|
|                              | Accuracy (%) <sup>a</sup> | RSD (%) <sup>b</sup> | Accuracy (%) | RSD (%) |                                      |      |       |
| <b>Melamine</b>              |                           |                      |              |         |                                      |      |       |
| In serum                     |                           |                      |              |         |                                      |      |       |
| 2                            | 100.4                     | 3.8                  | 102.5        | 6.2     | 1.99                                 | 2.00 | 1.33  |
| 5                            | 91.8                      | 2.5                  | 91.0         | 2.6     | 0.87                                 |      |       |
| 10                           | 101.8                     | 3.9                  | 107.7        | 0.5     | 5.80                                 |      |       |
| In air                       |                           |                      |              |         |                                      |      |       |
| 5                            | 99.7                      | 8.2                  | 101.9        | 2.3     | 2.21                                 | 0.50 | 50.00 |
| 50                           | 100.2                     | 7.3                  | 101.0        | 2.0     | 0.76                                 |      |       |
| 500                          | 98.4                      | 4.2                  | 98.6         | 2.9     | 0.21                                 |      |       |
| <b>Formaldehyde</b>          |                           |                      |              |         |                                      |      |       |
| In air                       |                           |                      |              |         |                                      |      |       |
| 15                           | 90.4                      | 3.1                  | 92.5         | 2.0     | 2.36                                 | 2.9  | 8.0   |
| 60                           | 94.1                      | 0.2                  | 91.6         | 0.2     | 2.66                                 |      |       |
| 300                          | 95.9                      | 0.3                  | 99.5         | 0.3     | 3.75                                 |      |       |

Abbreviation: LOQ = Limit of quantitation; MDL = method of detection limit; RSD = relative standard deviation or precision; SD = standard deviation.

<sup>a</sup>Accuracy = (mean observed concentration/standard concentration) × 100

<sup>b</sup>RSD = (SD/mean) × 100.

<sup>c</sup>Interday difference = [(mean of Day 2 – mean of Day 1) / mean of Day 1] × 100

**Supplemental Table 3. Daily averaged preshift and postshift urinary melamine concentration in melamine workers by work sites.**

| Mean ± SE                                    | Monday |         |    |          | Tuesday |         |    |          | Wednesday |         |    |          | Thursday |         |    |         | Friday |         |   |         | Saturday |         |    |             | Sunday |         |   |    | Monday |    |   |    |   |    |   |    |  |  |
|----------------------------------------------|--------|---------|----|----------|---------|---------|----|----------|-----------|---------|----|----------|----------|---------|----|---------|--------|---------|---|---------|----------|---------|----|-------------|--------|---------|---|----|--------|----|---|----|---|----|---|----|--|--|
|                                              | N      | AM      | N  | PM       | N       | AM      | N  | PM       | N         | AM      | N  | PM       | N        | AM      | N  | PM      | N      | AM      | N | PM      | N        | AM      | N  | PM          | N      | AM      | N | PM | N      | AM | N | PM | N | AM | N | PM |  |  |
| <i>Without creatinine correction (ng/ml)</i> |        |         |    |          |         |         |    |          |           |         |    |          |          |         |    |         |        |         |   |         |          |         |    |             |        |         |   |    |        |    |   |    |   |    |   |    |  |  |
| Manufacturers                                | 12     | 112.2 ± | 11 | 1321.3 ± | 12      | 739.3 ± | 12 | 1065.5 ± | 12        | 802.9 ± | 12 | 1116.2 ± | 11       | 753.2 ± | 10 | 793.1 ± | 11     | 752.2 ± | 5 | 534.2 ± | 11       | 404.7 ± | 11 | 181.9 ±     | 11     | 245.4 ± |   |    |        |    |   |    |   |    |   |    |  |  |
|                                              |        | 25.1    |    | 547.6    |         | 175.8   |    | 318.7    |           | 197.6   |    | 247.6    |          | 118.8   |    | 209.7   |        | 178.2   |   | 196.0   |          | 104.8   |    | 37.6        |        | 83.9    |   |    |        |    |   |    |   |    |   |    |  |  |
| Grinders                                     | 8      | 111.4 ± | 8  | 159.8 ±  | 8       | 105.0 ± | 8  | 174.3 ±  | 8         | 205.0 ± | 8  | 290.7 ±  | 7        | 190.9 ± | 7  | 258.7 ± | 7      | 160.8 ± | 2 | 236.9 ± | 6        | 110.3 ± | 6  | 65.8 ± 20.0 | 6      | 49.2 ±  |   |    |        |    |   |    |   |    |   |    |  |  |
|                                              |        | 41.2    |    | 44.4     |         | 28.7    |    | 40.9     |           | 81.1    |    | 71.6     |          | 41.2    |    | 60.5    |        | 37.8    |   | 47.3    |          | 50.5    |    | 8.5         |        |         |   |    |        |    |   |    |   |    |   |    |  |  |
| Packers                                      | 7      | 36.4 ±  | 7  | 134.0 ±  | 7       | 175.1 ± | 7  | 310.0 ±  | 6         | 432.8 ± | 7  | 267.6 ±  | 7        | 381.5 ± | 7  | 310.5 ± | 5      | 104.3 ± | 3 | 90.8 ±  | 6        | 77.6 ±  | 6  | 130.3 ±     | 6      | 46.1 ±  |   |    |        |    |   |    |   |    |   |    |  |  |
|                                              |        | 13.4    |    | 31.6     |         | 89.3    |    | 99.6     |           | 229.4   |    | 78.9     |          | 205.2   |    | 94.7    |        | 44.4    |   | 20.4    |          | 21.6    |    | 108.6       |        | 13.1    |   |    |        |    |   |    |   |    |   |    |  |  |
| Administrators                               | 8      | 18.5 ±  | 8  | 69.4 ±   | 8       | 34.3 ±  | 8  | 66.0 ±   | 8         | 44.3 ±  | 8  | 41.2 ±   | 8        | 39.5 ±  | 7  | 38.9 ±  | 7      | 23.7 ±  | 5 | 20.4 ±  | 7        | 43.1 ±  | 7  | 80.4 ±      | 7      | 88.3 ±  |   |    |        |    |   |    |   |    |   |    |  |  |
|                                              |        | 5.9     |    | 29.2     |         | 10.6    |    | 24.2     |           | 11.6    |    | 13.8     |          | 12.7    |    | 12.7    |        | 6.5     |   | 7.0     |          | 20.4    |    | 43.0        |        | 34.3    |   |    |        |    |   |    |   |    |   |    |  |  |
| <i>With creatinine correction (µg/mmol)</i>  |        |         |    |          |         |         |    |          |           |         |    |          |          |         |    |         |        |         |   |         |          |         |    |             |        |         |   |    |        |    |   |    |   |    |   |    |  |  |
| Manufacturers                                | 12     | 11.5 ±  | 11 | 74.6 ±   | 12      | 61.3 ±  | 12 | 80.0 ±   | 12        | 65.1 ±  | 12 | 97.0 ±   | 11       | 89.0 ±  | 10 | 112.7 ± | 11     | 83.8 ±  | 5 | 51.9 ±  | 11       | 44.9 ±  | 11 | 19.0 ±      | 11     | 27.5 ±  |   |    |        |    |   |    |   |    |   |    |  |  |
|                                              |        | 2.0     |    | 17.2     |         | 9.8     |    | 10.9     |           | 8.3     |    | 17.6     |          | 15.3    |    | 18.0    |        | 16.5    |   | 11.7    |          | 11.1    |    | 3.5         |        | 9.3     |   |    |        |    |   |    |   |    |   |    |  |  |
| Grinders                                     | 8      | 8.9 ±   | 8  | 14.0 ±   | 8       | 11.5 ±  | 8  | 15.3 ±   | 8         | 21.5 ±  | 8  | 25.6 ±   | 7        | 25.0 ±  | 7  | 18.6 ±  | 7      | 16.3 ±  | 2 | 16.0 ±  | 6        | 9.5 ±   | 6  | 8.2 ±       | 6      | 6.9 ±   |   |    |        |    |   |    |   |    |   |    |  |  |
|                                              |        | 1.8     |    | 1.6      |         | 1.7     |    | 3.3      |           | 6.9     |    | 3.3      |          | 7.1     |    | 2.6     |        | 3.1     |   | 1.7     |          | 2.3     |    | 1.6         |        | 1.9     |   |    |        |    |   |    |   |    |   |    |  |  |
| Packers                                      | 7      | 3.8 ±   | 7  | 7.8 ±    | 7       | 15.2 ±  | 7  | 16.7 ±   | 6         | 42.7 ±  | 7  | 30.0 ±   | 7        | 27.2 ±  | 7  | 21.9 ±  | 5      | 12.3 ±  | 3 | 6.1 ±   | 6        | 8.4 ±   | 6  | 16.3 ±      | 6      | 5.8 ±   |   |    |        |    |   |    |   |    |   |    |  |  |
|                                              |        | 0.6     |    | 1.8      |         | 5.7     |    | 4.0      |           | 19.5    |    | 14.0     |          | 14.6    |    | 6.3     |        | 3.8     |   | 0.8     |          | 2.1     |    | 12.4        |        | 0.9     |   |    |        |    |   |    |   |    |   |    |  |  |
| Administrators                               | 8      | 1.7 ±   | 8  | 4.9 ±    | 8       | 3.0 ±   | 8  | 5.7 ±    | 8         | 3.0 ±   | 8  | 3.6 ±    | 8        | 3.1 ±   | 7  | 4.1 ±   | 7      | 1.9 ±   | 5 | 2.4 ±   | 7        | 3.4 ±   | 7  | 9.7 ±       | 7      | 10.3 ±  |   |    |        |    |   |    |   |    |   |    |  |  |
|                                              |        | 0.8     |    | 2.0      |         | 0.7     |    | 2.3      |           | 0.6     |    | 0.6      |          | 0.7     |    | 1.2     |        | 0.5     |   | 0.9     |          | 0.9     |    | 6.9         |        | 4.8     |   |    |        |    |   |    |   |    |   |    |  |  |

Abbreviation: SE = Standard error; AM = morning (pre-shift); PM = afternoon (post-shift).

**Supplemental Table 4. Daily averaged ambient personal and area melamine and formaldehyde concentrations ( $\mu\text{g}/\text{m}^3$ ) in melamine workers by work sites.**

|                          | Monday |                  | Tuesday |                  | Wednesday |                  | Thursday |                  | Friday |                  | Five days |                  |
|--------------------------|--------|------------------|---------|------------------|-----------|------------------|----------|------------------|--------|------------------|-----------|------------------|
|                          | N      | Mean $\pm$ SE    | N       | Mean $\pm$ SE    | N         | Mean $\pm$ SE    | N        | Mean $\pm$ SE    | N      | Mean $\pm$ SE    | N         | Mean $\pm$ SE    |
| <i>Melamine</i>          |        |                  |         |                  |           |                  |          |                  |        |                  |           |                  |
| <i>Personal samplers</i> |        |                  |         |                  |           |                  |          |                  |        |                  |           |                  |
| Manufacturers            | 5      | 131.6 $\pm$ 64.5 | 3       | 15.1 $\pm$ 4.5   | 4         | 39.1 $\pm$ 30.3  | 5        | 93.2 $\pm$ 54.5  | 1      | 426.4            | 18        | 97.3 $\pm$ 31.4  |
| Grinders                 | 6      | 14.4 $\pm$ 8.4   | 5       | 9.1 $\pm$ 5.1    | 5         | 48.5 $\pm$ 57.8  | 6        | 115.5 $\pm$ 51.0 | 4      | 32.6 $\pm$ 13.5  | 26        | 46.1 $\pm$ 14.6  |
| Packers                  | 3      | 12.0 $\pm$ 7.9   | 3       | 12.3 $\pm$ 5.3   | 0         |                  | 3        | 4.2 $\pm$ 1.6    | 1      | 2.3              | 10        | 8.8 $\pm$ 2.9    |
| <i>Area samplers</i>     |        |                  |         |                  |           |                  |          |                  |        |                  |           |                  |
| Manufacturing area       | 5      | 23.2 $\pm$ 10.2  | 4       | 2.7 $\pm$ 1.4    | 5         | 21.0 $\pm$ 13.0  | 4        | 16.1 $\pm$ 13.8  | 0      |                  | 18        | 16.5 $\pm$ 5.4   |
| Grinding area            | 1      | 2.7              | 1       | 12.5             | 2         | 10.1 $\pm$ 5.9   | 0        |                  | 0      |                  | 4         | 8.9 $\pm$ 3.2    |
| Packing area             | 4      | 2.7 $\pm$ 2.2    | 5       | 1.6 $\pm$ 0.6    | 4         | 1.1 $\pm$ 0.4    | 3        | 1.3 $\pm$ 0.2    | 1      | 2.6              | 17        | 1.8 $\pm$ 0.5    |
| Administrative area      | 2      | 0.3 $\pm$ 0.1    | 2       | 0.3 $\pm$ 0.0    | 2         | 1.2 $\pm$ 0.9    | 1        | 0.4              | 1      | 0.5              | 8         | 0.6 $\pm$ 0.2    |
| <i>Formaldehyde</i>      |        |                  |         |                  |           |                  |          |                  |        |                  |           |                  |
| <i>Personal samplers</i> |        |                  |         |                  |           |                  |          |                  |        |                  |           |                  |
| Manufacturers            | 5      | 229.0 $\pm$ 18.5 | 3       | 184.6 $\pm$ 20.7 | 5         | 193.5 $\pm$ 11.5 | 5        | 212.3 $\pm$ 5.3  | 1      | 208.8            | 19        | 207.2 $\pm$ 7.2  |
| Grinders                 | 6      | 139.3 $\pm$ 37.0 | 5       | 144.9 $\pm$ 32.4 | 5         | 113.7 $\pm$ 31.6 | 6        | 159.3 $\pm$ 33.4 | 4      | 141.1 $\pm$ 20.6 | 26        | 140.3 $\pm$ 13.9 |
| Packers                  | 2      | 74.6 $\pm$ 34.7  | 3       | 44.2 $\pm$ 12.7  | 0         | -                | 3        | 82.4 $\pm$ 52.3  | 1      | 21.6             | 9         | 61.2 $\pm$ 18.2  |
| <i>Area samplers</i>     |        |                  |         |                  |           |                  |          |                  |        |                  |           |                  |
| Manufacturing area       | 5      | 81.2 $\pm$ 14.5  | 4       | 71.9 $\pm$ 18.0  | 5         | 109.7 $\pm$ 31.1 | 4        | 171.5 $\pm$ 34.3 | 0      |                  | 18        | 107.1 $\pm$ 14.7 |
| Grinding area            | 1      | 76.1             | 1       | 77.0             | 2         | 55.2 $\pm$ 2.6   | 0        | -                | 0      |                  | 4         | 65.9 $\pm$ 6.3   |
| Packing area             | 5      | 31.3 $\pm$ 12.7  | 5       | 36.5 $\pm$ 9.2   | 5         | 40.6 $\pm$ 6.8   | 3        | 45.8 $\pm$ 2.1   | 1      | 27.6             | 19        | 37.2 $\pm$ 4.3   |
| Administrative area      | 2      | 24.4 $\pm$ 18.0  | 3       | 30.6 $\pm$ 9.6   | 2         | 14.7 $\pm$ 2.5   | 1        | 26.8             | 1      | 16.5             | 9         | 23.7 $\pm$ 4.7   |

Abbreviation: SE = Standard error.

**Supplemental Table 5. Daily averaged ambient concentrations of different dust particle sizes (particulate matter (PM) 10, 2.5, and 1.0 µm) by portable laser aerosol spectrometers and dust monitors in one melamine manufacturing company (Factory A) during work.**

| Dust size<br>(µg/m <sup>3</sup> ) | Manufacturing area |       |            |       |                                     | Administrative area |       |            |       |                                  | p-value  |
|-----------------------------------|--------------------|-------|------------|-------|-------------------------------------|---------------------|-------|------------|-------|----------------------------------|----------|
|                                   | N                  | ≤ 100 | >100-≤ 200 | > 200 | Mean±SD<br>(Min, Median, Max)       | N                   | ≤ 100 | >100-≤ 200 | > 200 | Mean±SD<br>(Min, Median, Max)    |          |
| <b>Monday</b>                     |                    |       |            |       |                                     |                     |       |            |       |                                  |          |
| PM 10                             | 381                | 300   | 67         | 14    | 75.5±53.5<br>(23.9, 55.6, 398.5)    | 476                 | 475   | 0          | 1     | 25.7±20.1<br>(12.9, 23.2, 426.6) | < 0.0001 |
| PM 2.5                            |                    | 304   | 63         | 14    | 73.9±52.2<br>(23.8, 54.4, 391.3)    |                     | 475   | 0          | 1     | 24.4±8.7<br>(12.9, 22.6, 134.9)  | < 0.0001 |
| PM 1.0                            |                    | 324   | 50         | 7     | 65.1±44.0<br>(20.5, 47.4, 320.5)    |                     | 476   | 0          | 0     | 22.5±5.9<br>(12.6, 21.5, 51.5)   | < 0.0001 |
| <b>Tuesday</b>                    |                    |       |            |       |                                     |                     |       |            |       |                                  |          |
| PM 10                             | 389                | 303   | 83         | 3     | 81.0±32.7<br>(31.6, 72.4, 248.7)    | 569                 | 566   | 3          | 0     | 35.5±16.6<br>(18.4, 30.2, 156.7) | < 0.0001 |
| PM 2.5                            |                    | 316   | 71         | 2     | 77.4±30.0<br>(31.6, 70.6, 217.1)    |                     | 566   | 3          | 0     | 34.8±15.6<br>(18.4, 29.9, 150.5) | < 0.0001 |
| PM 1.0                            |                    | 359   | 30         | 0     | 65.5±22.1<br>(30.9, 61.1, 164.8)    |                     | 567   | 2          | 0     | 32.5±13.9<br>(17.5, 28.4, 122.2) | < 0.0001 |
| <b>Wednesday</b>                  |                    |       |            |       |                                     |                     |       |            |       |                                  |          |
| PM 10                             | 386                | 110   | 237        | 39    | 132.8±60.1<br>(39.7, 118.6, 479.2)  | 576                 | 576   | 0          | 0     | 20.2±5.0<br>(12.6, 19.9, 67.5)   | < 0.0001 |
| PM 2.5                            |                    | 119   | 228        | 39    | 128.7±57.0<br>(39.1, 116.0, 466.4)  |                     | 576   | 0          | 0     | 19.9±4.4<br>(12.6, 19.8, 36.9)   | < 0.0001 |
| PM 1.0                            |                    | 176   | 190        | 20    | 112.4±47.1<br>(34.5, 103.6, 394.8)  |                     | 576   | 0          | 0     | 19.0±4.0<br>(12.0, 19.1, 32.2)   | < 0.0001 |
| <b>Thursday</b>                   |                    |       |            |       |                                     |                     |       |            |       |                                  |          |
| PM 10                             | 389                | 41    | 258        | 90    | 180.5±112.7<br>(62.5, 138.4, 732.2) | 570                 | 570   | 0          | 0     | 36.6±10.9<br>(12.0, 35.4, 73.9)  | < 0.0001 |
| PM 2.5                            |                    | 51    | 251        | 87    | 172.6±100.6<br>(62.2, 134.4, 695.5) |                     | 570   | 0          | 0     | 36.3±10.7<br>(12.0, 35.2, 70.4)  | < 0.0001 |
| PM 1.0                            |                    | 92    | 226        | 71    | 149.7±75.8<br>(59.1, 126.3, 556.7)  |                     | 570   | 0          | 0     | 34.9±10.3<br>(11.8, 33.8, 59.6)  | < 0.0001 |
| <b>Friday</b>                     |                    |       |            |       |                                     |                     |       |            |       |                                  |          |
| PM 10                             | 541                | 303   | 132        | 106   | 136.7±146.8<br>(15.8, 91.7, 1861.8) | 574                 | 574   | 0          | 0     | 28.6±14.7<br>(6.8, 27.2, 75.3)   | < 0.0001 |
| PM 2.5                            |                    | 312   | 128        | 101   | 131.9±140.2<br>(14.5, 88.4, 1761.1) |                     | 574   | 0          | 0     | 28.2±14.4<br>(6.8, 26.9, 63.0)   | < 0.0001 |
| PM 1.0                            |                    | 348   | 111        | 82    | 112.6±114.6<br>(11.5, 77.4, 1384.1) |                     | 574   | 0          | 0     | 26.2±13.3<br>(6.5, 25.7, 58.5)   | < 0.0001 |
| <b>Five days</b>                  |                    |       |            |       |                                     |                     |       |            |       |                                  |          |
| PM 10                             | 2086               | 1057  | 777        | 252   | 121.1±102.2<br>(15.8, 98.3, 1861.8) | 2765                | 2761  | 3          | 1     | 29.6±15.6<br>(6.8, 26.4, 426.6)  | < 0.0001 |
| PM 2.5                            |                    | 1102  | 741        | 243   | 116.7±95.9<br>(14.5, 95.4, 1761.1)  |                     | 2761  | 3          | 1     | 29.0±13.2<br>(6.8, 26.2, 150.5)  | < 0.0001 |
| PM 1.0                            |                    | 1299  | 607        | 180   | 100.6±77.4<br>(11.5, 84.4, 1384.1)  |                     | 2763  | 2          | 0     | 27.3±12.0<br>(6.5, 24.7, 122.2)  | < 0.0001 |

Abbreviation: SD = Standard deviation.

**Supplemental Table 6. Daily variations of preshift and postshift urinary melamine concentrations concentrations in generalized linear mixed models.<sup>a</sup>**

| Variables                                     | $\beta$ | SE    | 95% CI          | p-value |
|-----------------------------------------------|---------|-------|-----------------|---------|
| <b>a) Model 1<sup>b</sup></b>                 |         |       |                 |         |
| Work sites                                    |         |       |                 |         |
| Non- manufacturers                            | 1       | -     | -               | -       |
| Manufacturers                                 | 28.99   | 8.51  | 12.31~45.66     | 0.001   |
| Sampling day                                  |         |       |                 |         |
| Mon                                           | 1       | -     | -               | -       |
| Tue                                           | -15.73  | 6.56  | -28.58 ~ -2.87  | 0.016   |
| Wed                                           | -13.27  | 6.61  | -26.2 ~ -0.31   | 0.045   |
| Thu                                           | -19.22  | 6.79  | -32.54 ~ -5.90  | 0.005   |
| Fri                                           | -28.91  | 9.02  | -46.59 ~ -11.22 | 0.001   |
| <b>b) Model 2<sup>b</sup></b>                 |         |       |                 |         |
| Air melamine ( $\mu\text{g}/\text{m}^3$ )     | 0.09    | 0.04  | 0.01 ~ 0.17     | 0.034   |
| Sampling day                                  |         |       |                 |         |
| Mon                                           | 1       | -     | -               | -       |
| Tue                                           | -9.40   | 5.15  | -19.48 ~ 0.69   | 0.068   |
| Wed                                           | -0.23   | 5.51  | -11.03 ~ 10.56  | 0.966   |
| Thu                                           | -12.60  | 4.96  | -22.32 ~ -2.87  | 0.011   |
| Fri                                           | -22.03  | 8.84  | -39.36 ~ -4.70  | 0.013   |
| <b>c) Model 3<sup>b</sup></b>                 |         |       |                 |         |
| Air formaldehyde ( $\mu\text{g}/\text{m}^3$ ) | 0.03    | 0.06  | -0.10 ~ 0.15    | 0.658   |
| Sampling day                                  |         |       |                 |         |
| Mon                                           | 1       | -     | -               | -       |
| Tue                                           | -13.63  | 6.33  | -26.03 ~ -1.22  | 0.031   |
| Wed                                           | -6.59   | 6.51  | -19.35 ~ 6.16   | 0.311   |
| Thu                                           | -15.37  | 6.14  | -27.40 ~ -3.34  | 0.012   |
| Fri                                           | -20.04  | 10.53 | -40.69 ~ 0.60   | 0.057   |
| <b>d) Model 4<sup>c</sup></b>                 |         |       |                 |         |
| Work sites                                    |         |       |                 |         |
| Non-manufacturers                             | 1       | -     | -               | -       |
| Manufacturers                                 | 39.66   | 5.47  | 28.93 ~ 50.38   | < 0.001 |
| Day                                           |         |       |                 |         |
| Mon                                           | 1       | -     | -               | -       |

|     |       |      |               |         |
|-----|-------|------|---------------|---------|
| Tue | 20.25 | 5.92 | 8.65 ~ 31.86  | 0.001   |
| Wed | 28.75 | 5.97 | 17.06 ~ 40.45 | < 0.001 |
| Thu | 34.68 | 6.02 | 22.89 ~ 46.48 | < 0.001 |
| Fri | 28.19 | 6.18 | 16.07 ~ 40.31 | < 0.001 |
| Sat | 12.15 | 6.18 | 0.03 ~ 24.26  | 0.049   |
| Sun | 5.47  | 6.18 | -6.65 ~ 17.58 | 0.377   |
| Mon | 6.33  | 6.18 | -5.79 ~ 18.44 | 0.306   |

Abbreviation: CI = Confidence interval; SE = standard error;

<sup>a</sup>Adjusting for age, sex, educational level, BMI, smoking status, and serum uric acid.

<sup>b</sup>Dependent variable: Daily difference of preshift and postshift urinary melamine concentrations (postshift - preshift).

<sup>c</sup>Dependent variable: Daily preshift urinary melamine concentrations.



**Supplemental Table 7. Other clinical and laboratory data in melamine tableware manufacturing workers by work sites and their comparison group.**

| Variables                       | Exposed workers (N = 44)             |                                      |                                      |                                      | Non-exposed workers                  | <i>p</i> -value <sup>a</sup><br>(Overall) | <i>p</i> -value <sup>b</sup><br>(Manufacturers vs.<br>controls) |  |
|---------------------------------|--------------------------------------|--------------------------------------|--------------------------------------|--------------------------------------|--------------------------------------|-------------------------------------------|-----------------------------------------------------------------|--|
|                                 | Manufacturers                        | Grinders                             | Packers                              | Administrators                       | Controls                             |                                           |                                                                 |  |
| <b>N</b>                        | 16                                   | 8                                    | 10                                   | 10                                   | 105                                  |                                           |                                                                 |  |
|                                 | <b>Mean ± SD (Median, IQR)</b>       |                                      |                                      |                                      |                                      |                                           |                                                                 |  |
| Height (cm)                     | 166.2 ± 7.2<br>(165.0, 159.6-171.4)  | 162.3 ± 6.5<br>(161.0, 158.3-167.8)  | 156.0 ± 9.5<br>(157.0, 153.6-165.3)  | 167.0 ± 10.6<br>(164.0, 160.3-175.5) | 168.1 ± 6.6<br>(168.6, 163.3-172.9)  | 0.010                                     | 0.307                                                           |  |
| Weight (kg)                     | 63.9 ± 13.1<br>(67.9, 51.9-72.3)     | 59.2 ± 6.5<br>(59.4, 54.4-64.8)      | 57.8 ± 9.7<br>(56.9, 50.1-65.9)      | 72.4 ± 28.2<br>(62, 53.6-84.8)       | 67.2 ± 9.5<br>(67.6, 60.2-73.6)      | 0.022                                     | 0.665                                                           |  |
| Waist (cm)                      | 79.2 ± 9.8<br>(81.5, 76.3-85.8)      | 75.4 ± 5.6<br>(75.5, 70.3-80.3)      | 76.2 ± 5.5<br>(77.0, 70.8-80.8)      | 84.9 ± 18.5<br>(78.0, 75.3-92.3)     | 81.5 ± 11.3<br>(82.0, 78.0-88.0)     | 0.011                                     | 0.411                                                           |  |
| Hip (cm)                        | 92.1 ± 6.7<br>(93.5, 89.0-96.5)      | 93.5 ± 6.4<br>(92.5, 90.5-93.8)      | 92.3 ± 5.0<br>(93.5, 87.3-96.3)      | 98.3 ± 10.4<br>(95.0, 91.0-102.0)    | 93.5 ± 14.0<br>(95.0, 92.0-99.0)     | 0.141                                     | 0.092                                                           |  |
| Blood Pressure (mmHg)           |                                      |                                      |                                      |                                      |                                      |                                           |                                                                 |  |
| Systolic blood pressure         | 124.3 ± 16.3<br>(123.0, 112.8-138.3) | 117.0 ± 18.0<br>(115.0, 106.3-120.5) | 109.7 ± 10.0<br>(110.5, 101.8-119.3) | 120.5 ± 12.5<br>(119.5, 109.8-132.8) | 132.5 ± 14.2<br>(132.0, 123.0-139.0) | <0.0001                                   | 0.073                                                           |  |
| Diastolic blood pressure        | 74.6 ± 11.2<br>(72.0, 63.0-84.0)     | 68.8 ± 12.1<br>(64.5, 60.3-76.8)     | 67.2 ± 8.5<br>(69.5, 58.8-74.3)      | 77.0 ± 11.4<br>(74.0, 67.3-85.8)     | 84.6 ± 11.8<br>(86.0, 74.5-92.0)     | <0.0001                                   | 0.003                                                           |  |
|                                 | <b>N (%)</b>                         |                                      |                                      |                                      |                                      |                                           |                                                                 |  |
| Hypertension (> 140/90<br>mmHg) |                                      |                                      |                                      |                                      |                                      |                                           |                                                                 |  |
| Abnormal                        | 2 (12.5)                             | 1 (12.5)                             | 0                                    | 1 (10.0)                             | 32 (30.5)                            | 0.094                                     | 0.231                                                           |  |
| Normal                          | 14 (87.5)                            | 7 (87.5)                             | 10 (100.0)                           | 9 (90.0)                             | 73 (69.5)                            |                                           |                                                                 |  |

**Liver function**

|                                  |                                      |                                      |                                      |                                      |                                      |         |         |
|----------------------------------|--------------------------------------|--------------------------------------|--------------------------------------|--------------------------------------|--------------------------------------|---------|---------|
| GOT (IU/L)                       | 23.7 ± 6.1<br>(23.5, 18.5-27.0)      | 38.8 ± 43.2<br>(24.0, 19.5-31.3)     | 21.0 ± 5.6<br>(22.5, 17.3-25.5)      | 25.3 ± 10.1<br>(22.5, 18.8-28.0)     | 26.4 ± 9.5<br>(25.0, 20.0-30.0)      | 0.505   | 0.402   |
| GPT (IU/L)                       | 21.8 ± 12.4<br>(20.5, 14.5-25.5)     | 33.6 ± 36.1<br>(22.0, 15.0-32.8)     | 17.3 ± 7.0<br>(15.5, 11.8-23.0)      | 22.5 ± 18.5<br>(18.5, 9.8-24.8)      | 28.2 ± 17.6<br>(24.0, 16.0-36.0)     | 0.088   | 0.131   |
| r-GT (IU/L)                      | 36.2 ± 23.2<br>(31.0, 18.8-45.8)     | 98.9 ± 187.8<br>(25.5, 17.5-80.0)    | 18.6 ± 4.0<br>(20.5, 16.5-21.0)      | 30.3 ± 21.5<br>(18.5, 13.0-56.5)     | 35.4 ± 32.4<br>(28.0, 20.0-38.3)     | 0.046   | 0.640   |
| <b>Cadiometabolic indicators</b> |                                      |                                      |                                      |                                      |                                      |         |         |
| Glu(Ac) (mg/dL)                  | 106.9 ± 61.7<br>(89.0, 87.3-97.8)    | 84.1 ± 4.9<br>(84.5, 80.5-88.3)      | 84.3 ± 10.7<br>(82.0, 79.0-88.0)     | 90.5 ± 15.9<br>(90.0, 78.3-96.3)     | 100.5 ± 34.3<br>(93.0, 85.0-101.0)   | 0.006   | 0.717   |
| T-cholesterol (mg/dL)            | 187.4 ± 44.9<br>(180.5, 154.5-216.5) | 162.8 ± 20.0<br>(158.5, 150.5-183.3) | 194.0 ± 35.8<br>(196.0, 168.0-221.0) | 183.2 ± 25.8<br>(186.0, 164.5-201.8) | 204.8 ± 36.4<br>(204.0, 182.0-227.0) | 0.004   | 0.068   |
| Triglyceride (mg/dL)             | 120.1 ± 109.8<br>(90.0, 58.3-141.3)  | 120.0 ± 140.2<br>(76.5, 52.3-101.8)  | 90.0 ± 42.5<br>(82.0, 56.0-108.5)    | 123.1 ± 106.6<br>(72.0, 56.0-167.5)  | 119.1 ± 68.3<br>(102.0, 80.0-147.0)  | 0.253   | 0.330   |
| Fibrinogen (mg/dL)               | 258.4 ± 41.4<br>(266.2, 221.6-292.5) | 286.6 ± 75.4<br>(285.9, 212.0-352.2) | 281.6 ± 58.1<br>(263.8, 246.5-306.5) | 281.3 ± 41.7<br>(288.4, 262.6-299.7) | 293.0 ± 62.5<br>(293.8, 246.5-323.9) | 0.300   | 0.033   |
| HSCRP (mg/dL)                    | 0.1 ± 0.1<br>(0.1, 0.0-0.1)          | 0.1 ± 0.1<br>(0.1, 0.0-0.1)          | 0.1 ± 0.1<br>(0.1, 0.0-0.1)          | 0.1 ± 0.1<br>(0.1, 0.0-0.2)          | 0.1 ± 0.1<br>(0.1, 0.0-0.1)          | <0.0001 | <0.0001 |
| <b>Lung function</b>             |                                      |                                      |                                      |                                      |                                      |         |         |
| FVC (L)                          | 2.9 ± 0.5<br>(2.9, 2.6-3.4)          | 2.8 ± 0.8<br>(2.7, 2.2-3.5)          | 2.8 ± 1.1<br>(2.4, 2.2-3.1)          | 3.0 ± 0.7<br>(2.9, 2.5-3.3)          | 3.5 ± 0.6<br>(3.4, 3.0-3.9)          | <0.0001 | 0.001   |
| FVC (%)                          | 78.8 ± 14.9<br>(78.5, 68.2-82.7)     | 81.1 ± 19.6<br>(80.0, 73.9-83.8)     | 80.3 ± 10.8<br>(81.2, 70.0-91.3)     | 74.6 ± 9.0<br>(77.4, 69.4-81.4)      | 89.8 ± 12.6<br>(87.0, 81.5-99.2)     | <0.0001 | 0.002   |
| FEV1 (L)                         | 2.8 ± 0.5<br>(2.8, 2.5-3.4)          | 2.6 ± 0.8<br>(2.7, 1.7-3.2)          | 2.7 ± 1.1<br>(2.3, 2.1-2.9)          | 2.7 ± 0.7<br>(2.7, 2.3-2.9)          | 3.3 ± 0.6<br>(3.2, 2.9-3.5)          | <0.0001 | 0.007   |

|              |                                  |                                 |                                  |                                  |                                 |       |       |
|--------------|----------------------------------|---------------------------------|----------------------------------|----------------------------------|---------------------------------|-------|-------|
| FEV1/FVC (%) | 96.1 ± 5.4<br>(98.8, 92.0-100.0) | 92.1 ± 7.6<br>(92.5, 86.1-99.7) | 95.8 ± 4.4<br>(96.7, 92.4-100.0) | 92.9 ± 9.3<br>(96.9, 87.8-100.0) | 93.2 ± 5.7<br>(94.0, 89.5-97.8) | 0.195 | 0.032 |
|--------------|----------------------------------|---------------------------------|----------------------------------|----------------------------------|---------------------------------|-------|-------|

---

**Blood routine WBC**

|                           |                                      |                                      |                                      |                                      |                                      |         |       |
|---------------------------|--------------------------------------|--------------------------------------|--------------------------------------|--------------------------------------|--------------------------------------|---------|-------|
| WBC (10 <sup>3</sup> /uL) | 6.4 ± 1.6<br>(6.0, 5.3-6.5)          | 6.5 ± 1.5<br>(6.1, 5.1-7.9)          | 7.0 ± 2.1<br>(6.7, 5.1-8.5)          | 7.6 ± 2.0<br>(7.0, 6.4-8.8)          | 6.1 ± 1.4<br>(5.8, 5.2-6.9)          | 0.094   | 0.742 |
| RBC (10 <sup>6</sup> /uL) | 4.9 ± 0.5<br>(4.8, 4.7-5.4)          | 4.6 ± 0.4<br>(4.6, 4.2-5.0)          | 4.9 ± 0.5<br>(4.8, 4.5-5.4)          | 5.0 ± 0.7<br>(5.0, 4.5-5.6)          | 5.2 ± 0.5<br>(5.2, 4.9-5.4)          | 0.005   | 0.032 |
| HGB (g/dL)                | 14.9 ± 1.5<br>(14.8, 13.9-16.3)      | 13.8 ± 1.3<br>(13.6, 13.1-15.3)      | 13.7 ± 1.5<br>(13.8, 12.2-14.5)      | 14.4 ± 1.3<br>(14.1, 13.5-15.6)      | 15.2 ± 1.2<br>(15.4, 14.4-16.0)      | 0.001   | 0.402 |
| HCT (%)                   | 44.0 ± 4.2<br>(43.7, 40.7-47.7)      | 41.6 ± 3.7<br>(41.3, 38.8-45.3)      | 41.0 ± 3.4<br>(40.7, 39.0-42.9)      | 43.3 ± 3.7<br>(42.9, 40.8-45.6)      | 45.2 ± 3.0<br>(45.8, 43.6-47.2)      | <0.0001 | 0.174 |
| MCHC (g/dL)               | 33.8 ± 0.7<br>(33.8, 33.3-34.3)      | 33.3 ± 0.7<br>(33.4, 32.5-33.9)      | 33.2 ± 1.2<br>(33.4, 32.15-34.33)    | 33.3 ± 0.9<br>(33.0, 32.7-34.1)      | 33.6 ± 1.0<br>(33.6, 33.1-34.2)      | 0.433   | 0.415 |
| MCH (pg)                  | 30.4 ± 2.4<br>(30.7, 30.1-31.5)      | 29.9 ± 1.4<br>(29.8, 28.5-31.4)      | 28.1 ± 3.6<br>(29.8, 26.9-30.1)      | 28.9 ± 3.0<br>(30.0, 28.4-30.5)      | 29.3 ± 2.9<br>(30.1, 28.9-30.9)      | 0.121   | 0.044 |
| MCV (fl)                  | 89.7 ± 6.5<br>(91.7, 89.1-92.8)      | 89.9 ± 3.2<br>(89.3, 86.7-93.3)      | 84.4 ± 9.2<br>(89.2, 80.2-90.0)      | 86.6 ± 8.3<br>(89.8, 82.8-92.3)      | 87.2 ± 7.6<br>(88.6, 85.5-91.4)      | 0.199   | 0.049 |
| PLT (10 <sup>3</sup> /uL) | 212.1 ± 46.0<br>(206.0, 182.0-248.5) | 221.1 ± 47.5<br>(205.5, 179.8-262.5) | 276.9 ± 67.7<br>(289.0, 234.5-318.5) | 250.3 ± 70.4<br>(249.0, 196.8-273.3) | 233.0 ± 48.8<br>(232.0, 196.5-268.5) | 0.055   | 0.131 |

**N (%)**

**Abdominal echo**

|             |   |          |   |          |           |   |   |
|-------------|---|----------|---|----------|-----------|---|---|
| Nephrectomy | 0 | 0        | 0 | 1 (10.0) | 1 (1.0)   | - | - |
| Gall stone  | 0 | 0        | 0 | 0        | 9 (9.0)   | - | - |
| Renal stone | 0 | 1 (12.5) | 0 | 1 (10.0) | 10 (10.0) | - | - |

---

**Urine routine**

---

|           |           |          |          |          |            |       |       |
|-----------|-----------|----------|----------|----------|------------|-------|-------|
| Strip-GLU |           |          |          |          |            | 0.826 | 0.546 |
| Normal    | 13 (81.3) | 7 (87.5) | 9 (90.0) | 9 (90.0) | 97 (92.4)  |       |       |
| Abnormal  | 1 (6.3)   | 0        | 0        | 0        | 5 (4.8)    |       |       |
| Miss      | 2 (12.5)  | 1 (12.5) | 1 (10.0) | 1 (10.0) | 3 (2.9)    |       |       |
| Strip-BIL |           |          |          |          |            | 0.005 | -     |
| Normal    | 14 (87.5) | 7 (87.5) | 8 (80.0) | 9 (90.0) | 102 (97.1) |       |       |
| Abnormal  | 0         | 0        | 1 (10.0) | 0        | 0          |       |       |
| Miss      | 2 (12.5)  | 1 (12.5) | 1 (10.0) | 1 (10.0) | 3 (2.9)    |       |       |
| Strip-KET |           |          |          |          |            | 0.542 | 0.346 |
| Normal    | 12 (75.0) | 7 (87.5) | 9 (90.0) | 9 (90.0) | 94 (89.5)  |       |       |
| Abnormal  | 2 (12.5)  | 0        | 0        | 0        | 8 (7.6)    |       |       |
| Miss      | 2 (12.5)  | 1 (12.5) | 1 (10.0) | 1 (10.0) | 3 (2.9)    |       |       |
| Strip-SG  |           |          |          |          |            | 0.399 | 0.248 |
| Normal    | 12 (75.0) | 6 (75.0) | 8 (80.0) | 7 (70.0) | 96 (91.4)  |       |       |
| Abnormal  | 2 (12.5)  | 1 (12.5) | 1 (10.0) | 2 (20.0) | 6 (5.7)    |       |       |
| Miss      | 2 (12.5)  | 1 (12.5) | 1 (10.0) | 1 (10.0) | 3 (2.9)    |       |       |
| Strip-OB  |           |          |          |          |            | 0.830 | 0.637 |
| Normal    | 12 (75.0) | 6 (75.0) | 8 (80.0) | 7 (70.0) | 92 (87.6)  |       |       |
| Abnormal  | 2 (12.5)  | 1 (12.5) | 1 (10.0) | 2 (20.0) | 10 (9.5)   |       |       |
| Miss      | 2 (12.5)  | 1 (12.5) | 1 (10.0) | 1 (10.0) | 3 (2.9)    |       |       |
| Strip-PH  |           |          |          |          |            | -     | -     |
| Normal    | 14 (87.5) | 7 (87.5) | 9 (90.0) | 9 (90.0) | 102 (97.1) |       |       |
| Abnormal  | 0         | 0        | 0        | 0        | 0          |       |       |
| Miss      | 2 (12.5)  | 1 (12.5) | 1 (10.0) | 1 (10.0) | 3 (2.9)    |       |       |
| Strip-PRO |           |          |          |          |            | 0.538 | 0.302 |

|           |           |          |          |          |            |         |   |
|-----------|-----------|----------|----------|----------|------------|---------|---|
| Normal    | 9 (56.3)  | 6 (75.0) | 8 (80.0) | 8 (80.0) | 81 (77.1)  |         |   |
| Abnormal  | 5 (31.3)  | 1 (12.5) | 1 (10.0) | 1 (10.0) | 21 (21.0)  |         |   |
| Miss      | 2 (12.5)  | 1 (12.5) | 1 (10.0) | 1 (10.0) | 3 (2.9)    |         |   |
| Strip-URO |           |          |          |          |            | 0.883   | 1 |
| Normal    | 14 (87.5) | 7 (87.5) | 9 (90.0) | 9 (90.0) | 99 (94.3)  |         |   |
| Abnormal  | 0         | 0        | 0        | 0        | 3 (2.9)    |         |   |
| Miss      | 2 (12.5)  | 1 (12.5) | 1 (10.0) | 1 (10.0) | 3 (2.9)    |         |   |
| Strip-NIT |           |          |          |          |            | 0.005   | - |
| Normal    | 14 (87.5) | 7 (87.5) | 9 (90.0) | 8 (80.0) | 102 (97.1) |         |   |
| Abnormal  | 0         | 0        | 0        | 1 (10.0) | 0          |         |   |
| Miss      | 2 (12.5)  | 1 (12.5) | 1 (10.0) | 1 (10.0) | 3 (2.9)    |         |   |
| Strip-WBC |           |          |          |          |            | <0.0001 | 1 |
| Normal    | 14 (87.5) | 5 (62.5) | 5 (50.0) | 5 (50.0) | 99 (94.3)  |         |   |
| Abnormal  | 0         | 2 (25.0) | 4 (40.0) | 4 (40.0) | 3 (2.9)    |         |   |
| Miss      | 2 (12.5)  | 1 (12.5) | 1 (10.0) | 1 (10.0) | 3 (2.9)    |         |   |

Abbreviation: SD = Standard deviation; IQR = interquarater range.

<sup>a</sup>Kruskal-Wallis test or Chi-square test.

<sup>b</sup>Wilcoxon rank sum test or Fisher's exact test.

**Supplemental Table 8. Relationship of urinary biomarkers of renal injury with urinary melamine levels or work sites after adjusting for hypertension in multiple linear regression models.**

| Log <sub>10</sub> NAG <sup>a</sup>               | N   | Mean ± SD       | Median, IQR       | Adjusted <sup>c</sup>                |                    |
|--------------------------------------------------|-----|-----------------|-------------------|--------------------------------------|--------------------|
|                                                  |     |                 |                   | β (SE)                               | p-value            |
| <b>Model1</b>                                    |     |                 |                   |                                      |                    |
| Urinary melamine (µg/mmol Cr)                    | 81  | 0.7 ± 1.5       | 0.5, 0.3-0.8      | 0.004 (0.001)                        | 0.0003             |
| Hypertension (mmHg)                              |     |                 |                   |                                      |                    |
| Normal                                           | 61  | 0.6 ± 0.4       | 0.5, 0.3-0.8      | 1                                    | -                  |
| Abnormal (>140/90)                               | 20  | 1.2 ± 3.0       | 0.5, 0.4-0.7      | 0.169 (0.076)                        | 0.029              |
| <b>Model2<sup>d</sup></b>                        |     |                 |                   |                                      |                    |
| Non-exposed workers                              |     |                 |                   |                                      |                    |
| Administrators                                   | 9   | 0.6 ± 0.3       | 0.6, 0.4-0.8      | 0.162 (0.103)                        | 0.119              |
| Grinders & packers                               | 16  | 0.7 ± 0.6       | 0.7, 0.3-0.9      | 0.103 (0.093)                        | 0.272              |
| Manufacturers                                    | 14  | 1.8 ± 3.5       | 0.9, 0.4-1.4      | 0.234 (0.102)                        | 0.023 <sup>e</sup> |
| Hypertension (mmHg)                              |     |                 |                   |                                      |                    |
| Normal                                           | 108 | 0.5 ± 0.4       | 0.4, 0.3-0.7      | 1                                    | -                  |
| Abnormal (>140/90)                               | 36  | 0.9 ± 2.3       | 0.5, 0.3-0.6      | 0.157 (0.054)                        | 0.004              |
| <b>Log<sub>10</sub> Microalbumin<sup>a</sup></b> |     |                 |                   |                                      |                    |
| <b>Model1</b>                                    |     |                 |                   |                                      |                    |
| Urinary melamine (µg/mmol Cr)                    | 81  | 3.3 ± 20.5      | 0.5, 0.4-1.0      | 0.003 (0.001)                        | 0.063              |
| Hypertension (mmHg)                              |     |                 |                   |                                      |                    |
| Normal                                           | 61  | 0.9 ± 1.4       | 0.5, 0.4-0.8      | 1                                    | -                  |
| Abnormal (>140/90)                               | 20  | 10.3 ± 41.2     | 0.6, 0.4-1.3      | 0.273 (0.110)                        | 0.016              |
| <b>Model2</b>                                    |     |                 |                   |                                      |                    |
| Non-exposed workers                              |     |                 |                   |                                      |                    |
| Administrators                                   | 9   | 1.5 ± 2.7       | 0.4, 0.3-0.6      | -0.153 (0.178)                       | 0.389              |
| Grinders & packers                               | 16  | 0.9 ± 0.5       | 0.6, 0.4-1.5      | -0.161 (0.161)                       | 0.320              |
| Manufacturers                                    | 14  | 14.8 ± 49.2     | 0.8, 0.4-1.1      | 0.048 (0.176)                        | 0.784              |
| Hypertension (mmHg)                              |     |                 |                   |                                      |                    |
| Normal                                           | 108 | 0.9 ± 1.4       | 0.6, 0.4-0.9      | 1                                    | -                  |
| Abnormal (>140/90)                               | 36  | 9.4 ± 32.2      | 0.6, 0.5-1.6      | 0.304 (0.093)                        | 0.001              |
| <b>β2-Microglobulin<sup>a</sup></b>              |     |                 |                   |                                      |                    |
|                                                  | N   | Normal<br>N (%) | Abnormal<br>N (%) | Adjusted OR<br>(95% CI) <sup>c</sup> |                    |
| <b>Model1</b>                                    |     |                 |                   |                                      |                    |
| Urinary melamine (µg/mmol Cr)                    | 81  | 75 (92.6)       | 6 (7.4)           | 1.03 (1.01-1.06)                     |                    |
| Hypertension (mmHg)                              |     |                 |                   |                                      |                    |
| Normal                                           | 61  | 56 (74.7)       | 5 (83.3)          | 1                                    |                    |
| Abnormal (>140/90)                               | 20  | 19 (25.3)       | 1 (16.7)          | 0.24 (0.01-8.20)                     |                    |
| <b>Model2<sup>d</sup></b>                        |     |                 |                   |                                      |                    |
| Non-exposed workers                              |     |                 |                   |                                      |                    |
| Administrators                                   | 9   | 9 (100.0)       | 0                 | -                                    |                    |
| Grinders & packers                               | 16  | 15 (93.8)       | 1 (6.2)           | 0.73 (0.04-15.27)                    |                    |
| Manufacturers                                    | 14  | 10 (71.4)       | 4 (28.6)          | 26.39 (1.09-636.79)                  |                    |
| Hypertension (mmHg)                              |     |                 |                   |                                      |                    |
| Normal                                           | 108 | 101 (74.8)      | 7 (77.8)          | 1                                    |                    |
| Abnormal (>140/90)                               | 36  | 34 (25.2)       | 2 (22.2)          | 0.87 (0.82-1.52)                     |                    |

Abbreviation: BMI = Body mass index; Cr = creatinine; NAG = N-acetyl-beta-D-glucosaminidase; OR = odds ratio.

<sup>a</sup>Multiple linear regression or logistic regression.

<sup>c</sup>Adjusting for age, sex, BMI, educational level, cigarette smoking, and serum uric acid.

<sup>d</sup>Missing data, N = 1 for office staff, 2 for grinders & packers, and 2 for manufacturers.

**Supplemental Table 9. Summary of literature data about industry of melamine-formaldehyde resin related to occupational melamine exposure.**

| Study                                           | Subjects/Source                                                                                                                                                                              | Exposure assessment                                                            | Ambient F/M <sup>a</sup> | Main results                                                                                                                                                                                                                                                                              |
|-------------------------------------------------|----------------------------------------------------------------------------------------------------------------------------------------------------------------------------------------------|--------------------------------------------------------------------------------|--------------------------|-------------------------------------------------------------------------------------------------------------------------------------------------------------------------------------------------------------------------------------------------------------------------------------------|
| <b>Case report or case series</b>               |                                                                                                                                                                                              |                                                                                |                          |                                                                                                                                                                                                                                                                                           |
| Strivastava et al., 1992 [India] <sup>8</sup>   | Six male workers who were employed for 3-10 years in the preparation of melamine resin from melamine formaldehyde in a paper mill.                                                           | Measure urinary formic acid, one metabolite of formaldehyde                    | -/-                      | 1. Range of urinary formic acid was 13.5-173.0 mg/1 (n = 6).<br>2. 4/6 of the subjects had low values of hemoglobin (< 14g%) and 3/6 had raised total lymphocyte counts (>3200).                                                                                                          |
| Aalto-Korte et al., 2003 [Finland] <sup>9</sup> | 1. Plywood industry (A 26-year-old man)<br>2. Production of melamine-laminated chipboard (A 38-year-old female)<br>3. Laboratory of analysis and production of resins (A 38-year-old female) | -                                                                              | -/-                      | Allergic contact dermatitis (Formaldehyde-negative)                                                                                                                                                                                                                                       |
| Garcia Gavin et al., 2008 [Spain] <sup>10</sup> | Plywood worker in the melamine paper impregnation line (A 28-year-old female)                                                                                                                | -                                                                              | -/-                      | Contact allergic dermatitis (patch-test: positive to melamine formaldehyde resins but negative to formaldehyde)                                                                                                                                                                           |
| <b>Epidemiologic study</b>                      |                                                                                                                                                                                              |                                                                                |                          |                                                                                                                                                                                                                                                                                           |
| Niemela & Vainio, 1981 [Finland] <sup>11</sup>  | Melamine-formaldehyde plastic in electrical machinery<br><br>Urea and melamine resins in particle board plants                                                                               | Monitor ambient formaldehyde concentrations in workplaces                      | +/-                      | Formaldehyde concentrations in air: 0.25-0.63 mg/m <sup>3</sup> (n = 8)<br><br>0.13-6.13 mg/m <sup>3</sup> (n = 220)                                                                                                                                                                      |
| Marsh et al., 1992 [PA, USA] <sup>12</sup>      | Study 20,067 white male workers exposed to formaldehyde in the presence of 12 selected co-exposures, including melamine exposure                                                             | Questionnaire                                                                  | -/-                      | Lung cancer mortality<br>Significant positive associations were found between the risk of lung cancer and cumulative exposure to formaldehyde in the presence of several co-exposures, including melamine (estimated RR=1.59 with over 1.5ppm-yr, p=0.04).                                |
| Isaksson et al., 1999 [Sweden] <sup>13</sup>    | 88 workers, employed for 4-6 years, worked in the composite production with the use of cellulose fibers and melamine-formaldehyde resins                                                     | Questionnaire                                                                  | -/-                      | Occupational dermatoses<br>1. 10.2% (9/88) diagnosed with occupational dermatoses<br>2. 5 workers had contact allergy to melamine-formaldehyde resin                                                                                                                                      |
| Lazarov. 2004 [Israel] <sup>14</sup>            | 644 contact dermatitis patients suspected exposed to textile                                                                                                                                 | -                                                                              | -/-                      | 83 (12.9%) had an allergic reaction to textile dyes and melamine formaldehyde resins.                                                                                                                                                                                                     |
| Neghab et al., 2011 [Iran] <sup>15</sup>        | 70 workers employed for 13.2±7.8 years, and 24 controls employed for 14.5±8.1 years in a melamine-formaldehyde resin producing plant                                                         | Monitor ambient formaldehyde concentrations in workplaces                      | +/-                      | Respiratory morbidity<br>1. Area formaldehyde: 0.78±0.4 ppm <sup>b</sup> for 7 workshops and ND for 1 office areas<br>2. Exposed group had higher frequency of respiratory symptoms.<br>3. Pulmonary function was significant decrements in preshift and postshift of exposed group.      |
| Wu et al., 2014 [Taiwan in our study]           | 44 exposed workers in melamine tableware manufacturing factories and 105 controls                                                                                                            | 1. Monitor ambient formaldehyde concentrations in workplaces<br><br>2. Monitor | +/+                      | Renal function impairment<br>1. Area formaldehyde: 107.1±14.7µg/m <sup>3</sup> in manufacturing area (n=18) and 23.7±4.7µg/m <sup>3</sup> in office area (n=9)<br>Area melamine: 16.5±5.4µg/m <sup>3</sup> in manufacturing area (n=18) and 0.6±0.2µg/m <sup>3</sup> in office area (n=8) |

---

personal  
formaldehyde  
concentrations  
in workplaces

2. Personal formaldehyde:  $207.2 \pm 7.2 \mu\text{g}/\text{m}^3$  in manufacturing area (n=19)  
Personal melamine:  $97.3 \pm 31.4 \mu\text{g}/\text{m}^3$  in manufacturing area (n=18)  
3. Manufacturers had the highest NAG levels and the highest detectable  $\beta$ 2-MG than controls, but not found in urinary microalbumin.

---

<sup>a</sup>F: ambient formaldehyde measurement; M: ambient melamine measurement

<sup>b</sup>Exceeded current permissible levels (0.3ppm) in Iran, 1ppm= $1.2 \text{ mg}/\text{m}^3$ .



**Supplemental Table 10. Summary of urinary melamine concentration variations in different populations from the literature.**

| Study / study time                                   | Subjects                                                                                                                                   | Analytic methods                              | Markers for renal damages in urine  | Results          |                                                                                                   |                                                                                     |                |                                                                                                                                                    |
|------------------------------------------------------|--------------------------------------------------------------------------------------------------------------------------------------------|-----------------------------------------------|-------------------------------------|------------------|---------------------------------------------------------------------------------------------------|-------------------------------------------------------------------------------------|----------------|----------------------------------------------------------------------------------------------------------------------------------------------------|
|                                                      |                                                                                                                                            |                                               |                                     | Study groups     | Melamine concentrations without creatinine correction (ng/ml)                                     | Melamine concentrations with creatinine correction ( $\mu\text{g}/\text{mmol Cr}$ ) | % of < LOQ/MDL | Outcome of renal injuries                                                                                                                          |
| <b>Affected children from 2008 melamine incident</b> |                                                                                                                                            |                                               |                                     |                  |                                                                                                   |                                                                                     |                |                                                                                                                                                    |
| Lam et al., 2009 [Hong Kong, China] <sup>16</sup>    | 14 cases (urinary stones)<br>20 controls (non-stones)<br>(Aged < 3 yrs)<br>All with a confirmed history of consuming melamine-tainted milk | LC-MS/MS (SPE)<br>MDL: not available          | Protein, microalbumin, $\beta$ 2-MG | Cases            | -                                                                                                 | 21 <sup>a</sup><br>(0.87-2002)                                                      | 0              | 2/11 cases and no controls with detectable $\beta$ 2-MG                                                                                            |
| 2008/9                                               |                                                                                                                                            |                                               |                                     | Controls         | -                                                                                                 | 6.6 <sup>a</sup><br>(0.08-37)                                                       | 0              |                                                                                                                                                    |
| Cheng et al., 2009 [Taipei, Taiwan] <sup>17</sup>    | 10 nephrolithiasis<br>20 matched-controls<br>(Aged 2-9 yrs)                                                                                | UPLC-MS/MS (SPE)<br>LOQ: 10 ppb<br>MDL: 6 ppb | -                                   | Cases            | -<br>(30-300)                                                                                     | -<br>(9-71) <sup>b</sup>                                                            | 70             | -                                                                                                                                                  |
| 2008/9                                               |                                                                                                                                            |                                               |                                     | Controls         | -<br>(20)                                                                                         | -<br>(2.3-2.6) <sup>b</sup>                                                         | 90             |                                                                                                                                                    |
| Zhang et al., 2010 [Shanghai, China] <sup>18</sup>   | 86 children suspected to have ingested melamine-tainted powdered formula<br>(Aged 0-8 yrs)                                                 | LC-MS/MS (LLE)<br>LOQ: 10 ppb                 | -                                   |                  | < 10 (17.4%)<br><b>10-100 (46.5%)</b><br>100-1000 (17.4%)<br>1000-10000 (16.3%)<br>> 10000 (2.3%) | -                                                                                   | -              | -                                                                                                                                                  |
| After 2008/9                                         |                                                                                                                                            |                                               |                                     |                  |                                                                                                   |                                                                                     |                |                                                                                                                                                    |
| Gao et al., 2011 [Shanghai, china] <sup>19</sup>     | 96 children with melamine-tainted milk associated urolithiasis:<br>Baseline & follow-up at 6 months<br>(Aged $\leq$ 6 yrs)                 | -                                             | Microalbumin, immunoglobulin G, NAG |                  | -                                                                                                 | -                                                                                   | -              | Detection rate of abnormal urinary microprotein excretion: 54.2% in children with persistent stones, vs. 38.2% in children who passed their stones |
| <b>Urolithiasis in adults</b>                        |                                                                                                                                            |                                               |                                     |                  |                                                                                                   |                                                                                     |                |                                                                                                                                                    |
| Wu et al., 2010 [Kaoshiung, Taiwan] <sup>4</sup>     | 11 uric acid stones<br>21 calcium stones<br>22 matched-controls<br>(Aged 36-69 yrs)                                                        | LC-MS/MS (SPE)<br>LOQ: 2 ppb<br>MDL: 0.4 ppb  | -                                   | Uric acid stones | 3.5                                                                                               | 0.5                                                                                 | 36.4           | -                                                                                                                                                  |
| 2003-2007                                            |                                                                                                                                            |                                               |                                     | Calcium stones   | 1.02                                                                                              | 0.14                                                                                | 38.1           |                                                                                                                                                    |
|                                                      |                                                                                                                                            |                                               |                                     | Controls         | 0.4                                                                                               | 0.06                                                                                | 68.2           |                                                                                                                                                    |

|                                                          |                                                                                                                         |                                              |                             |                   |                                                                                                |                  |           |                                                                                                                                                 |  |
|----------------------------------------------------------|-------------------------------------------------------------------------------------------------------------------------|----------------------------------------------|-----------------------------|-------------------|------------------------------------------------------------------------------------------------|------------------|-----------|-------------------------------------------------------------------------------------------------------------------------------------------------|--|
| Liu et al., 2011<br>[Kaohsiung,<br>Taiwan] <sup>20</sup> | 211 calcium stones<br>211 matched-controls<br>(Aged 22-85 yrs)                                                          | LC-MS/MS (SPE)<br>LOQ: 1 ppb<br>MDL: 0.2 ppb | -                           | Calcium<br>stones | 0.9                                                                                            | 0.21             | 37.9      | -                                                                                                                                               |  |
|                                                          |                                                                                                                         |                                              |                             |                   | Controls                                                                                       | 0.2              | 0.02      | 79.6                                                                                                                                            |  |
| 2003-2007                                                |                                                                                                                         |                                              |                             |                   |                                                                                                |                  |           |                                                                                                                                                 |  |
| <b>General population</b>                                |                                                                                                                         |                                              |                             |                   |                                                                                                |                  |           |                                                                                                                                                 |  |
| Zhang et al., 2010<br>[Shanghai,<br>China] <sup>18</sup> | 110 adults (Aged 25-75 yrs)<br>for health examination after<br>the 2008 melamine incident                               | LC-MS/MS (LLE)<br>LOQ: 10 ppb                | -                           |                   | < 10 (12.7%)<br><b>10-100 (69.1%)</b><br>100-1000 (13.6%)<br>1000-10000 (4.5%)<br>> 10000 (0%) | -                | -         | -                                                                                                                                               |  |
| After 2008/9                                             |                                                                                                                         |                                              |                             |                   |                                                                                                |                  |           |                                                                                                                                                 |  |
| Kong et al., 2011<br>[Hong Kong,<br>China] <sup>21</sup> | 502 school children (Aged<br>6-20 yrs)                                                                                  | LC-MS/MS<br>LOQ: 5 ppb                       | Albumin                     |                   | -                                                                                              | 0.8<br>(ND-1467) | 42.0      | High melamine<br>exposure (> 7.1<br>µg/mmol Cr) not<br>associated with high<br>excretion of albumin<br>in urine                                 |  |
| 2007-2008                                                |                                                                                                                         |                                              |                             |                   |                                                                                                |                  |           |                                                                                                                                                 |  |
| Panuwet et al.,<br>2012<br>[Georgia, USA] <sup>22</sup>  | 492 general US adults                                                                                                   | LC-MS/MS (SPE)<br>Method LOD: 0.66<br>ppb    | -                           |                   | GM 2.37<br>(ND-161)                                                                            | -                | 24.0      | -                                                                                                                                               |  |
| Not available                                            |                                                                                                                         |                                              |                             |                   |                                                                                                |                  |           |                                                                                                                                                 |  |
| Lin et al., 2013<br>[Kaohsiung,<br>Taiwan] <sup>5</sup>  | 22 school children (median<br>age 8.0 yrs) and their parents<br>(n = 44, median age 40 yrs)                             | LC-MS/MS (SPE)<br>LOQ: 2 ppb<br>MDL: 0.4 ppb | NAG, β2-MG,<br>microalbumin | Children          | 7.20-9.42                                                                                      | 0.93-1.73        | 0         | No associations<br>between melamine<br>exposure and urinary<br>NAG and<br>microalbumin                                                          |  |
|                                                          |                                                                                                                         |                                              |                             |                   | Mothers                                                                                        | 4.49-6.53        | 0.87-1.21 | 2.9                                                                                                                                             |  |
|                                                          |                                                                                                                         |                                              |                             |                   | Fathers                                                                                        | 4.91-5.11        | 0.84-0.87 |                                                                                                                                                 |  |
| 2011                                                     |                                                                                                                         |                                              |                             |                   |                                                                                                |                  |           |                                                                                                                                                 |  |
| Wu et al., 2013<br>[Kaohsiung,<br>Taiwan] <sup>23</sup>  | 12 volunteers (Aged 20-27<br>yrs)<br>Cross-over study design<br>6/6 melamine tableware<br>2011/12 6/6 ceramic tableware |                                              | -                           | Melamine          |                                                                                                |                  |           |                                                                                                                                                 |  |
|                                                          |                                                                                                                         |                                              |                             |                   | 0 hr                                                                                           | 9.41             | 0.98      | 0                                                                                                                                               |  |
|                                                          |                                                                                                                         |                                              |                             |                   | 6 hr                                                                                           | 26.89            | 5.59      |                                                                                                                                                 |  |
|                                                          |                                                                                                                         |                                              |                             |                   | Ceramic                                                                                        |                  |           |                                                                                                                                                 |  |
|                                                          |                                                                                                                         |                                              |                             |                   | 0 hr                                                                                           | 11.40            | 1.02      | 33.0                                                                                                                                            |  |
|                                                          |                                                                                                                         |                                              |                             |                   | 6 hr                                                                                           | 1.26             | 0.25      |                                                                                                                                                 |  |
| <b>Occupational workers</b>                              |                                                                                                                         |                                              |                             |                   |                                                                                                |                  |           |                                                                                                                                                 |  |
| Our study<br>[Kaohsiung,<br>Taiwan]                      | Two melamine tableware<br>manufacturing factories<br>(Aged 25-57 yrs)                                                   | LC-MS/MS (SPE)<br>LOQ: 2 ppb<br>MDL: 0.4 ppb | NAG, β2-MG,<br>microalbumin | Manufacturers     | 943.0                                                                                          | 80.5             | 0         | Urinary melamine<br>levels were<br><b>significantly and<br/>positively</b> associated<br>with NAG levels and<br>the detectable rate of<br>β2-MG |  |
|                                                          |                                                                                                                         |                                              |                             |                   | Grinders                                                                                       | 206.3            | 16.2      | 0                                                                                                                                               |  |
|                                                          |                                                                                                                         |                                              |                             |                   | Packers                                                                                        | 252.6            | 15.9      | 0                                                                                                                                               |  |

|                                                                                                                                 |                |      |     |     |
|---------------------------------------------------------------------------------------------------------------------------------|----------------|------|-----|-----|
| 10 packers<br>10 administrators<br>105 non-exposed workers<br>from one shipbuilding<br>company as controls (Aged<br>21-63 yrs ) | Administrators | 18.2 | 1.9 | 0   |
|                                                                                                                                 | Controls       | 4.3  | 0.3 | 7.1 |

Value represent as Median (range).

Abbreviation: Cr = Creatinine; LOQ = the lower limit of quantitation; MDL = the method detection limit; LC-MS/MS = liquid chromatography tandem mass spectrometry; SPE = solid-phase extraction; UPLC-MS/MS = ultra performance liquid chromatography tandem mass spectrometry; LLE = liquid-liquid extraction;  $\beta$ 2-MG = beta 2-microglobulin; NAG = N-acetyl- $\beta$ -glucosaminidase; ND = non detectable; GM = geometric mean.

<sup>a</sup>Urine samples collected at least 10 days of stopping the consumption of melamine-tainted milk products (Lam et al., 2009)<sup>16</sup>.

<sup>b</sup>Urine samples collected at first visit or 1 week later (Cheng et al., 2009).<sup>17</sup>
